# Supplementary material
Source: PubMed Central journal article supplement (PMC6594384)
Supplement: NIHMS1528409-supplement-Supplemental_Publication_Material.pdf [file NIHMS1528409-supplement-Supplemental_Publication_Material.pdf]

## **SUPPLEMENTAL MATERIAL**

**SUPPLEMENTAL MATERIAL: Empagliflozin and the risk of heart failure hospitalization in routine clinical care: a first analysis from the EMPagliflozin compaRative effectIveness and SafEty (EMPRISE) Study**

Patorno E, Pawar A, Franklin JM, Najafzadeh M, Déruaz-Luyet A, Brodovicz KG, Sambevski S, Bessette LG, Santiago Ortiz AJ, Kulldorff M, Schneeweiss S.

## Table of Contents

|                                                                                                                                                                                                                                      |    |
|--------------------------------------------------------------------------------------------------------------------------------------------------------------------------------------------------------------------------------------|----|
| Supplemental Figure 1. Flowchart of overall study populations of empagliflozin vs. DPP-4i initiators and SGLT2i vs. DPP-4i initiators. ....                                                                                          | 4  |
| Supplemental Figure 2. Cumulative incidence of hospitalization for heart failure comparing initiators of empagliflozin vs. DPP-4 inhibitors and SGLT2i vs. DPP-4i* .....                                                             | 5  |
| Supplemental Table 1. Baseline characteristics of patients initiating empagliflozin vs. sitagliptin before and after 1:1 PS-matching.....                                                                                            | 6  |
| Supplemental Table 2. Baseline characteristics of patients initiating empagliflozin vs. DPP-4i and SGLT2i vs. DPP-4i before and after 1:1 PS-matching .....                                                                          | 12 |
| Supplemental Table 3. Database-specific incidence rates and hazard ratios for hospitalization for heart failure in 1:1 PS-matched initiators of empagliflozin vs. sitagliptin, empagliflozin vs. DPP-4i, and SGLT2i vs. DPP-4i ..... | 21 |
| Supplemental Table 4. 1:1 high-dimensional-PS-matched initiators of empagliflozin vs. sitagliptin.....                                                                                                                               | 22 |
| Supplemental Table 5. Incidence rates and hazard ratios for hospitalization for heart failure (broad definition) in 1:1 PS-matched initiators of empagliflozin vs. sitagliptin stratified by duration of follow-up. ....             | 23 |
| Supplemental Table 6. Incidence rates and hazard ratio for the occurrence of flu vaccination during follow-up in 1:1 PS-matched initiators of empagliflozin vs. sitagliptin. ....                                                    | 24 |

**Supplemental Figure 1. Flowchart of overall study populations of empagliflozin vs. DPP-4i initiators and SGLT2i vs. DPP-4i initiators.**

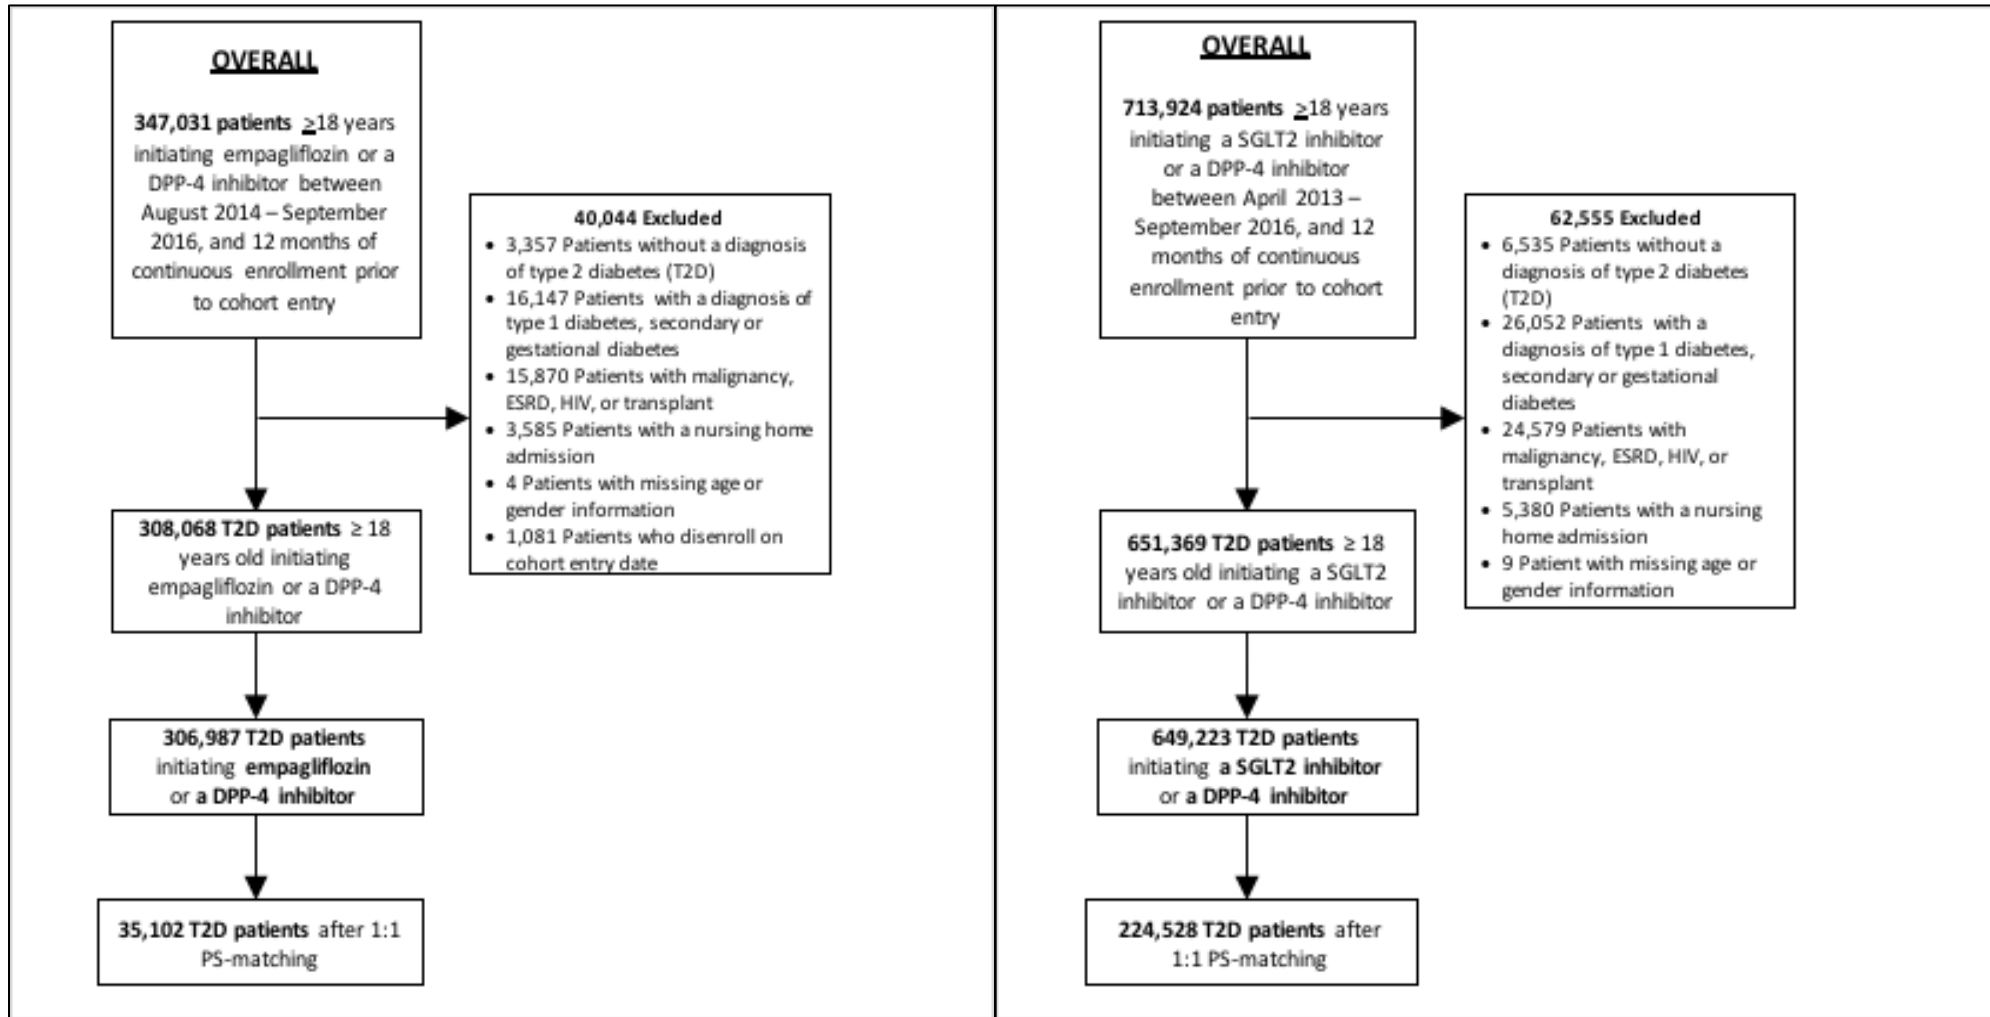

ESRD: end stage renal disease; HIV: human immunodeficiency virus; DPP-4: dipeptidyl peptidase-4; SGLT2i: sodium-glucose co-transporter-2; PS: propensity score

**Supplemental Figure 2. Cumulative incidence of hospitalization for heart failure comparing initiators of empagliflozin vs. DPP-4 inhibitors and SGLT2i vs. DPP-4i\***

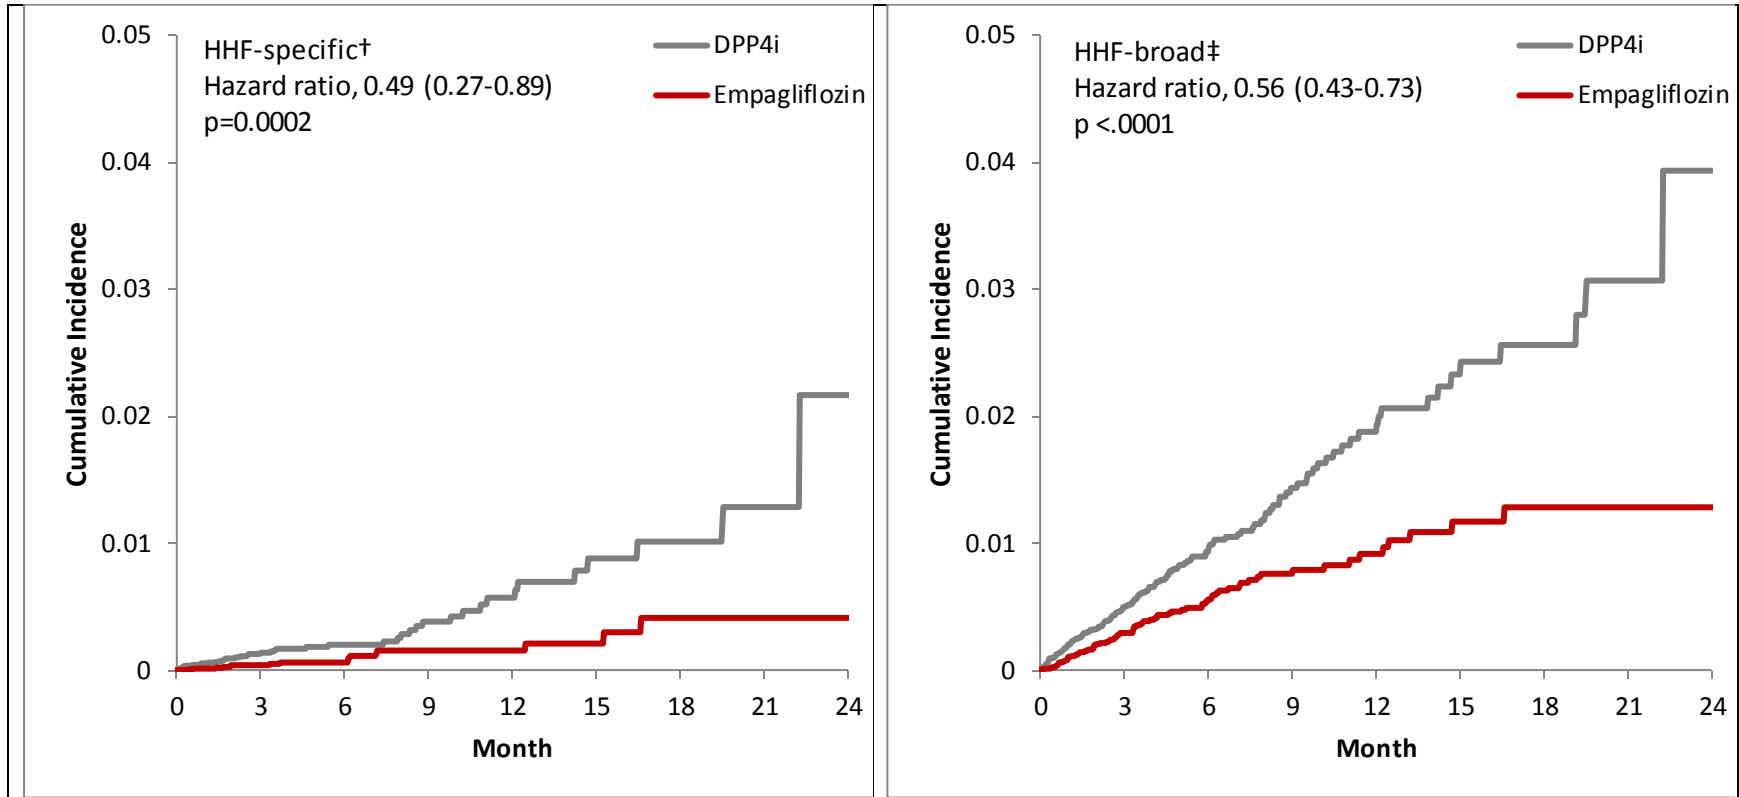

Supplemental Fig 2 (continued)

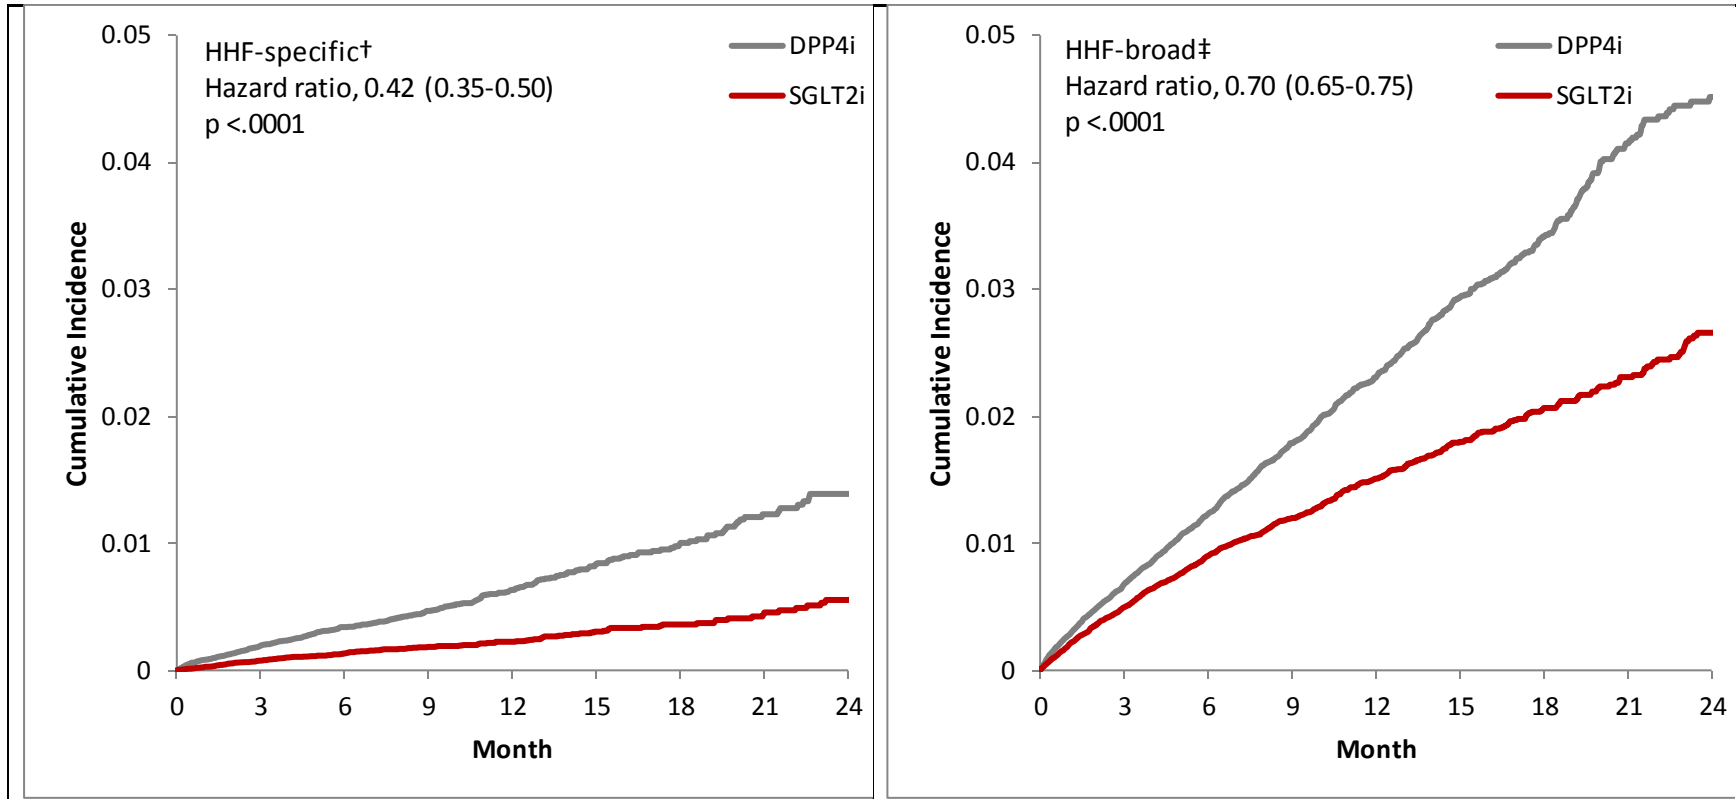

HHF: hospitalization for heart failure; HHF-broad: broad definition of HHF; HHF-specific: narrow definition of HHF; DPP-4: dipeptidyl peptidase-4; SGLT 2i: sodium-glucose co-transporter-2.

\*Analyses were 1:1 propensity score- matched among new users of the study agents.

†Discharge diagnosis of HF in the primary position

‡Discharge diagnosis of HF in any position

**Supplemental Table 1. Baseline characteristics of patients initiating empagliflozin vs. sitagliptin before and after 1:1 PS-matching**

| Baseline characteristics              | UNMATCHED                    |                               |           | PROPENSITY-SCORE MATCHED    |                               |           |
|---------------------------------------|------------------------------|-------------------------------|-----------|-----------------------------|-------------------------------|-----------|
|                                       | Sitagliptin<br>(N = 201,839) | Empagliflozin<br>(N = 18,880) | St. Diff. | Sitagliptin<br>(N = 16,443) | Empagliflozin<br>(N = 16,443) | St. Diff. |
| <b>Demographics</b>                   |                              |                               |           |                             |                               |           |
| Age; mean (sd)                        | 67.54 (9.46)                 | 58.41 (8.93)                  | 0.99      | 59.11 (9.11)                | 59.09 (8.94)                  | 0.00      |
| Age categories                        |                              |                               |           |                             |                               |           |
| 18 - 54; n (%)                        | 31,709 (15.7%)               | 6,923 (36.7%)                 | -0.49     | 5,729 (34.8%)               | 5,700 (34.7%)                 | 0.00      |
| 55 - 64; n (%)                        | 30,781 (15.3%)               | 5,877 (31.1%)                 | -0.38     | 4,834 (29.4%)               | 4,954 (30.1%)                 | -0.02     |
| 65 - 74; n (%)                        | 82,809 (41.0%)               | 4,742 (25.1%)                 | 0.34      | 4,587 (27.9%)               | 4,475 (27.2%)                 | 0.02      |
| >= 75; n (%)                          | 56,540 (28.0%)               | 1,338 (7.1%)                  | 0.57      | 1,293 (7.9%)                | 1,314 (8.0%)                  | 0.00      |
| Male; n (%)                           | 96,641 (47.9%)               | 10,168 (53.9%)                | -0.12     | 8,777 (53.4%)               | 8,816 (53.6%)                 | 0.00      |
| Race*                                 |                              |                               |           |                             |                               |           |
| White; n (%)                          | 86,435 (76.6%)               | 3,796 (84.7%)                 | -0.21     | 3,618 (84.5%)               | 3,610 (84.3%)                 | 0.01      |
| Black; n (%)                          | 12,007 (10.6%)               | 299 (6.7%)                    | 0.14      | 318 (7.4%)                  | 295 (6.9%)                    | 0.02      |
| Asian; n (%)                          | 5,084 (4.5%)                 | 111 (2.5%)                    | 0.11      | 107 (2.5%)                  | 110 (2.6%)                    | -0.01     |
| Hispanic; n (%)                       | 4,611 (4.1%)                 | 85 (1.9%)                     | 0.13      | 71 (1.7%)                   | 85 (2.0%)                     | -0.02     |
| North American Native; n (%)          | 487 (0.4%)                   | 18 (0.4%)                     | 0.00      | 19 (0.4%)                   | 18 (0.4%)                     | 0.00      |
| Other/Unknown; n (%)                  | 4,191 (3.7%)                 | 175 (3.9%)                    | -0.01     | 151 (3.5%)                  | 166 (3.9%)                    | -0.02     |
| Region                                |                              |                               |           |                             |                               |           |
| Northeast; n (%)                      | 35,911 (17.8%)               | 2,627 (13.9%)                 | 0.11      | 2,361 (14.4%)               | 2,350 (14.3%)                 | 0.00      |
| South; n (%)                          | 72,783 (36.1%)               | 5,966 (31.6%)                 | 0.10      | 5,113 (31.1%)               | 5,158 (31.4%)                 | -0.01     |
| Midwest; n (%)                        | 59,604 (29.5%)               | 7,576 (40.1%)                 | -0.22     | 6,534 (39.7%)               | 6,546 (39.8%)                 | 0.00      |
| West; n (%)                           | 33,002 (16.4%)               | 2,651 (14.0%)                 | 0.07      | 2,377 (14.5%)               | 2,336 (14.2%)                 | 0.01      |
| Calendar time                         |                              |                               |           |                             |                               |           |
| Quarter and year of cohort entry      |                              |                               |           |                             |                               |           |
| Q3 2014; n (%)                        | 17,936 (8.9%)                | 323 (1.7%)                    | 0.33      | 318 (1.9%)                  | 329 (2.0%)                    | 0.01      |
| Q4 2014; n (%)                        | 25,852 (12.8%)               | 1,548 (8.2%)                  | 0.15      | 1399 (8.5%)                 | 1344 (8.2%)                   | -0.01     |
| Q1 2015; n (%)                        | 24,048 (11.9%)               | 1,967 (10.4%)                 | 0.05      | 1,749 (10.6%)               | 1,701 (10.3%)                 | -0.01     |
| Q2 2015; n (%)                        | 25,279 (12.5%)               | 1,668 (8.8%)                  | 0.12      | 1511 (9.2%)                 | 1507 (9.2%)                   | 0.00      |
| Q3 2015; n (%)                        | 22,792 (11.3%)               | 1,449 (7.7%)                  | 0.12      | 1300 (7.9%)                 | 1253 (7.6%)                   | -0.01     |
| Q4 2015; n (%)                        | 20,779 (10.3%)               | 2,359 (12.5%)                 | -0.07     | 2,014 (12.2%)               | 2,062 (12.5%)                 | 0.01      |
| Q1 2016; n (%)                        | 23,298 (11.5%)               | 3,168 (16.8%)                 | -0.15     | 2,777 (16.9%)               | 2,802 (17.0%)                 | 0.00      |
| Q2 2016; n (%)                        | 22,139 (11.0%)               | 3,170 (16.8%)                 | -0.17     | 2,682 (16.3%)               | 2,736 (16.6%)                 | 0.01      |
| Q3 2016; n (%)                        | 19,716 (9.8%)                | 3,228 (17.1%)                 | -0.22     | 2,688 (16.3%)               | 2,704 (16.4%)                 | 0.00      |
| <b>Burden of comorbidities</b>        |                              |                               |           |                             |                               |           |
| Combined comorbidity score; mean (sd) | 2.89 (2.22)                  | 2.20 (1.59)                   | 0.36      | 2.22 (1.66)                 | 2.19 (1.63)                   | 0.02      |
| Frailty score, mean (sd)              | 1.76 (1.91)                  | 1.03 (1.34)                   | 0.44      | 1.06 (1.40)                 | 1.06 (1.36)                   | 0.00      |
| No. distinct diagnoses; mean (sd)     | 6.21 (9.25)                  | 5.39 (7.00)                   | 0.10      | 5.50 (7.02)                 | 5.36 (7.05)                   | 0.02      |
| <b>Diabetes-related complications</b> |                              |                               |           |                             |                               |           |
| Diabetic nephropathy; n (%)           | 20,082 (9.9%)                | 1,490 (7.9%)                  | 0.07      | 1,257 (7.6%)                | 1,247 (7.6%)                  | 0.00      |
| Diabetic retinopathy; n (%)           | 14,153 (7.0%)                | 1,122 (5.9%)                  | 0.04      | 966 (5.9%)                  | 957 (5.8%)                    | 0.00      |

|                                                                                 |                 |                |       |                |                |       |
|---------------------------------------------------------------------------------|-----------------|----------------|-------|----------------|----------------|-------|
| Diabetes with other ophthalmic conditions or ophthalmic procedures; n (%)       | 8,288 (4.1%)    | 685 (3.6%)     | 0.03  | 572 (3.5%)     | 575 (3.5%)     | 0.00  |
| Diabetic neuropathy; n (%)                                                      | 36,387 (18.0%)  | 3,216 (17.0%)  | 0.03  | 2,698 (16.4%)  | 2,694 (16.4%)  | 0.00  |
| Diabetes with peripheral circulatory disorders; n (%)                           | 12,811 (6.3%)   | 762 (4.0%)     | 0.10  | 701 (4.3%)     | 674 (4.1%)     | 0.01  |
| Diabetic Foot; n (%)                                                            | 4,986 (2.5%)    | 357 (1.9%)     | 0.04  | 329 (2.0%)     | 298 (1.8%)     | 0.01  |
| Lower extremity amputation; n (%)                                               | 881 (0.4%)      | 58 (0.3%)      | 0.02  | 058 (0.4%)     | 49 (0.3%)      | 0.02  |
| Skin infections; n (%)                                                          | 18,710 (9.3%)   | 1,653 (8.8%)   | 0.02  | 1,430 (8.7%)   | 1,398 (8.5%)   | 0.01  |
| Foot ulcer; n (%)                                                               | 5,013 (2.5%)    | 355 (1.9%)     | 0.04  | 324 (2.0%)     | 297 (1.8%)     | 0.01  |
| Erectile dysfunction; n (%)                                                     | 6,944 (3.4%)    | 870 (4.6%)     | -0.06 | 732 (4.5%)     | 737 (4.5%)     | 0.00  |
| Hypoglycemia; n (%)                                                             | 9,862 (4.9%)    | 737 (3.9%)     | 0.05  | 582 (3.5%)     | 624 (3.8%)     | -0.02 |
| Hyperglycemia; n (%)                                                            | 14,631 (7.2%)   | 1,160 (6.1%)   | 0.04  | 1,060 (6.4%)   | 1,057 (6.4%)   | 0.00  |
| Disorders of fluid electrolyte and acid-base balance; n (%)                     | 22,601 (11.2%)  | 1,074 (5.7%)   | 0.20  | 997 (6.1%)     | 952 (5.8%)     | 0.01  |
| Diabetic ketoacidosis; n (%)                                                    | 778 (0.4%)      | 52 (0.3%)      | 0.02  | 037 (0.2%)     | 42 (0.3%)      | -0.02 |
| Hyperosmolar hyperglycemic nonketotic syndrome; n (%)                           | 1,256 (0.6%)    | 94 (0.5%)      | 0.01  | 088 (0.5%)     | 084 (0.5%)     | 0.00  |
| Diabetes with unspecified complication; n (%)                                   | 10,778 (5.3%)   | 1,181 (6.3%)   | -0.04 | 1,001 (6.1%)   | 965 (5.9%)     | 0.01  |
| <b>Features of diabetes medication initiation and baseline diabetes therapy</b> |                 |                |       |                |                |       |
| No. antidiabetic drugs at cohort entry; mean (sd)                               | 2.16 (0.77)     | 2.29 (0.95)    | -0.15 | 2.21 (0.85)    | 2.22 (0.90)    | -0.01 |
| Naive new user <sup>†</sup> ; n (%)                                             | 27,139 (13.4%)  | 1,380 (7.3%)   | 0.20  | 1,294 (7.9%)   | 1,363 (8.3%)   | -0.01 |
| Monotherapy; n (%)                                                              | 20,203 (10.0%)  | 1,130 (6.0%)   | 0.15  | 1,061 (6.5%)   | 1,127 (6.9%)   | -0.02 |
| Dual therapy with metformin; n (%)                                              | 35,186 (17.4%)  | 2,715 (14.4%)  | 0.08  | 2,741 (16.7%)  | 2,681 (16.3%)  | 0.01  |
| Concomitant initiation or current use of metformin; n (%)                       | 131,791 (65.3%) | 11,305 (59.9%) | 0.11  | 10,010 (60.9%) | 10,092 (61.4%) | -0.01 |
| Concomitant initiation or current use of sulfonylureas; n (%)                   | 67,409 (33.4%)  | 4,849 (25.7%)  | 0.17  | 4,385 (26.7%)  | 4,378 (26.6%)  | 0.00  |
| Concomitant initiation or current use of insulin; n (%)                         | 19,559 (9.7%)   | 3,922 (20.8%)  | -0.31 | 3,010 (18.3%)  | 2,954 (18.0%)  | 0.01  |
| Concomitant initiation or current use of GLP-1 RAs; n (%)                       | 2,507 (1.2%)    | 2,929 (15.5%)  | -0.54 | 1,390 (8.5%)   | 1,479 (9.0%)   | -0.02 |
| Concomitant initiation or current use of glitazones; n (%)                      | 9,485 (4.7%)    | 1,237 (6.6%)   | -0.08 | 979 (6.0%)     | 1,002 (6.1%)   | 0.00  |
| Past use of metformin; n (%)                                                    | 28,860 (14.3%)  | 3,356 (17.8%)  | -0.10 | 2,868 (17.4%)  | 2,855 (17.4%)  | 0.00  |
| Past use of sulfonylureas; n (%)                                                | 19,487 (9.7%)   | 1,514 (8.0%)   | 0.06  | 1,230 (7.5%)   | 1,182 (7.2%)   | 0.01  |
| Past use of insulin; n (%)                                                      | 7,531 (3.7%)    | 1,549 (8.2%)   | -0.19 | 1,160 (7.1%)   | 1,153 (7.0%)   | 0.00  |
| Past use of GLP-1 RAs; n (%)                                                    | 3,551 (1.8%)    | 1,593 (8.4%)   | -0.30 | 1,164 (7.1%)   | 1,136 (6.9%)   | 0.01  |
| Past use of glitazones; n (%)                                                   | 4,634 (2.3%)    | 570 (3.0%)     | -0.04 | 430 (2.6%)     | 445 (2.7%)     | -0.01 |
| Any use of meglitinides; n (%)                                                  | 1,022 (0.5%)    | 93 (0.5%)      | 0.00  | 082 (0.5%)     | 77 (0.5%)      | 0.00  |
| Any use of alpha-glucosidase inhibitors; n (%)                                  | 369 (0.2%)      | 40 (0.2%)      | 0.00  | 038 (0.2%)     | 33 (0.2%)      | 0.00  |
| <b>Life style factors</b>                                                       |                 |                |       |                |                |       |
| Obesity; n (%)                                                                  | 44,813 (22.2%)  | 5,946 (31.5%)  | -0.21 | 4,922 (29.9%)  | 4,862 (29.6%)  | 0.01  |
| Overweight; n (%)                                                               | 10,176 (5.0%)   | 879 (4.7%)     | 0.01  | 746 (4.5%)     | 747 (4.5%)     | 0.00  |
| Smoking; n (%)                                                                  | 29,398 (14.6%)  | 1,988 (10.5%)  | 0.12  | 1,800 (10.9%)  | 1,776 (10.8%)  | 0.00  |
| Alcohol abuse or dependence; n (%)                                              | 1,943 (1.0%)    | 151 (0.8%)     | 0.02  | 115 (0.7%)     | 137 (0.8%)     | -0.01 |
| Drug abuse or dependence; n (%)                                                 | 2,565 (1.3%)    | 178 (0.9%)     | 0.04  | 171 (1.0%)     | 153 (0.9%)     | 0.01  |
| <b>Other comorbidities at baseline</b>                                          |                 |                |       |                |                |       |
| History of CV; n (%)                                                            | 74,342 (36.8%)  | 4,608 (24.4%)  | 0.27  | 4,115 (25.0%)  | 4,094 (24.9%)  | 0.00  |
| Ischemic heart disease; n (%)                                                   | 51,715 (25.6%)  | 3,382 (17.9%)  | 0.19  | 3,013 (18.3%)  | 2,980 (18.1%)  | 0.01  |
| Acute myocardial infarction; n (%)                                              | 4,461 (2.2%)    | 239 (1.3%)     | 0.07  | 231 (1.4%)     | 216 (1.3%)     | 0.01  |
| Old myocardial infarction; n (%)                                                | 4,776 (2.4%)    | 274 (1.5%)     | 0.07  | 263 (1.6%)     | 247 (1.5%)     | 0.01  |
| Unstable angina; n (%)                                                          | 8,051 (4.0%)    | 436 (2.3%)     | 0.10  | 420 (2.6%)     | 397 (2.4%)     | 0.01  |



|                                                                |                 |                |       |                |                |       |
|----------------------------------------------------------------|-----------------|----------------|-------|----------------|----------------|-------|
| Stable angina; n (%)                                           | 8,675 (4.3%)    | 564 (3.0%)     | 0.07  | 504 (3.1%)     | 506 (3.1%)     | 0.00  |
| Other chronic ischemic heart disease; n (%)                    | 48,521 (24.0%)  | 3,187 (16.9%)  | 0.18  | 2,824 (17.2%)  | 2,805 (17.1%)  | 0.00  |
| Previous coronary revascularization; n (%)                     | 15,386 (7.6%)   | 864 (4.6%)     | 0.13  | 754 (4.6%)     | 772 (4.7%)     | 0.00  |
| Ischemic or hemorrhagic stroke; n (%)                          | 19,753 (9.8%)   | 997 (5.3%)     | 0.17  | 948 (5.8%)     | 913 (5.6%)     | 0.01  |
| Ischemic stroke; n (%)                                         | 19,557 (9.7%)   | 989 (5.2%)     | 0.17  | 940 (5.7%)     | 905 (5.5%)     | 0.01  |
| Transient ischemic attack; n (%)                               | 4,995 (2.5%)    | 256 (1.4%)     | 0.08  | 229 (1.4%)     | 231 (1.4%)     | 0.00  |
| Hemorrhagic stroke and other cerebrovascular disease; n (%)    | 488 (0.2%)      | 15 (0.1%)      | 0.03  | 021 (0.1%)     | 014 (0.1%)     | 0.00  |
| Late effects of cerebrovascular disease or procedure; n (%)    | 4,207 (2.1%)    | 132 (0.7%)     | 0.12  | 134 (0.8%)     | 126 (0.8%)     | 0.00  |
| Heart failure; n (%)                                           | 21,514 (10.7%)  | 920 (4.9%)     | 0.22  | 884 (5.4%)     | 834 (5.1%)     | 0.01  |
| Peripheral arterial disease or surgery; n (%)                  | 20,610 (10.2%)  | 959 (5.1%)     | 0.19  | 863 (5.2%)     | 872 (5.3%)     | 0.00  |
| Atrial fibrillation; n (%)                                     | 19,834 (9.8%)   | 913 (4.8%)     | 0.19  | 843 (5.1%)     | 831 (5.1%)     | 0.00  |
| Other cardiac dysrhythmia; n (%)                               | 25,406 (12.6%)  | 1,468 (7.8%)   | 0.16  | 1,353 (8.2%)   | 1,307 (7.9%)   | 0.01  |
| Other cardiovascular disease; n (%)                            | 32,761 (16.2%)  | 1,831 (9.7%)   | 0.19  | 1,692 (10.3%)  | 1,647 (10.0%)  | 0.01  |
| Hypertension; n (%)                                            | 166,283 (82.4%) | 14,422 (76.4%) | 0.15  | 12,565 (76.4%) | 12,513 (76.1%) | 0.01  |
| Hyperlipidemia; n (%)                                          | 164,585 (81.5%) | 15,157 (80.3%) | 0.03  | 13,089 (79.6%) | 13,112 (79.7%) | 0.00  |
| Edema; n (%)                                                   | 21,273 (10.5%)  | 1,323 (7.0%)   | 0.12  | 1,164 (7.1%)   | 1,154 (7.0%)   | 0.00  |
| Non-diabetic renal dysfunction; n (%)                          | 43,386 (21.5%)  | 1,984 (10.5%)  | 0.30  | 1,811 (11.0%)  | 1,796 (10.9%)  | 0.00  |
| Acute kidney injury; n (%)                                     | 10,296 (5.1%)   | 282 (1.5%)     | 0.20  | 274 (1.7%)     | 270 (1.6%)     | 0.01  |
| Chronic kidney disease; n (%)                                  | 31,924 (15.8%)  | 1,268 (6.7%)   | 0.29  | 1,203 (7.3%)   | 1,164 (7.1%)   | 0.01  |
| Chronic kidney disease stage 1-2; n (%)                        | 6,939 (3.4%)    | 477 (2.5%)     | 0.05  | 420 (2.6%)     | 418 (2.5%)     | 0.01  |
| Chronic kidney disease stage 3+ or dialysis; n (%)             | 21,784 (10.8%)  | 661 (3.5%)     | 0.29  | 643 (3.9%)     | 628 (3.8%)     | 0.01  |
| Hypertensive nephropathy; n (%)                                | 15,583 (7.7%)   | 512 (2.7%)     | 0.23  | 525 (3.2%)     | 476 (2.9%)     | 0.02  |
| Miscellaneous renal insufficiency; n (%)                       | 16,349 (8.1%)   | 744 (3.9%)     | 0.18  | 668 (4.1%)     | 665 (4.0%)     | 0.01  |
| Kidney or bladder stones; n (%)                                | 7,475 (3.7%)    | 684 (3.6%)     | 0.01  | 570 (3.5%)     | 592 (3.6%)     | -0.01 |
| Urinary tract infections; n (%)                                | 30,963 (15.3%)  | 1,711 (9.1%)   | 0.19  | 1,533 (9.3%)   | 1,517 (9.2%)   | 0.00  |
| COPD; n (%)                                                    | 21,979 (10.9%)  | 1,056 (5.6%)   | 0.19  | 1,034 (6.3%)   | 987 (6.0%)     | 0.01  |
| Asthma; n (%)                                                  | 16,974 (8.4%)   | 1,374 (7.3%)   | 0.04  | 1,216 (7.4%)   | 1,193 (7.3%)   | 0.00  |
| Obstructive sleep apnea; n (%)                                 | 20,948 (10.4%)  | 2,867 (15.2%)  | -0.14 | 2,353 (14.3%)  | 2,390 (14.5%)  | -0.01 |
| Pneumonia; n (%)                                               | 8,710 (4.3%)    | 459 (2.4%)     | 0.11  | 443 (2.7%)     | 414 (2.5%)     | 0.01  |
| Liver disease; n (%)                                           | 13,943 (6.9%)   | 1,416 (7.5%)   | -0.02 | 1,218 (7.4%)   | 1,223 (7.4%)   | 0.00  |
| Osteoarthritis; n (%)                                          | 48,920 (24.2%)  | 3,163 (16.8%)  | 0.18  | 2,899 (17.6%)  | 2,847 (17.3%)  | 0.01  |
| Other arthritis, arthropathies and musculoskeletal pain; n (%) | 100,337 (49.7%) | 8,311 (44.0%)  | 0.11  | 7,291 (44.3%)  | 7,270 (44.2%)  | 0.00  |
| Dorsopathies; n (%)                                            | 63,631 (31.5%)  | 5,280 (28.0%)  | 0.08  | 4,604 (28.0%)  | 4,623 (28.1%)  | 0.00  |
| Fractures; n (%)                                               | 9,015 (4.5%)    | 587 (3.1%)     | 0.07  | 503 (3.1%)     | 522 (3.2%)     | -0.01 |
| Falls; n (%)                                                   | 8,920 (4.4%)    | 388 (2.1%)     | 0.13  | 373 (2.3%)     | 346 (2.1%)     | 0.01  |
| Osteoporosis; n (%)                                            | 13,943 (6.9%)   | 1,416 (7.5%)   | -0.02 | 1,218 (7.4%)   | 1,223 (7.4%)   | 0.00  |
| Disorders of thyroid gland; n (%)                              | 38,065 (18.9%)  | 3,244 (17.2%)  | 0.04  | 2,857 (17.4%)  | 2,788 (17.0%)  | 0.01  |
| Depression; n (%)                                              | 26,202 (13.0%)  | 2,130 (11.3%)  | 0.05  | 1,893 (11.5%)  | 1,846 (11.2%)  | 0.01  |
| Anxiety; n (%)                                                 | 21,485 (10.6%)  | 1,864 (9.9%)   | 0.02  | 1,701 (10.3%)  | 1,629 (9.9%)   | 0.01  |
| Sleep disorders; n (%)                                         | 29,267 (14.5%)  | 3,034 (16.1%)  | -0.04 | 2,609 (15.9%)  | 2,601 (15.8%)  | 0.00  |
| Dementia; n (%)                                                | 11,214 (5.6%)   | 266 (1.4%)     | 0.23  | 258 (1.6%)     | 252 (1.5%)     | 0.01  |
| Delirium; n (%)                                                | 3,307 (1.6%)    | 104 (0.6%)     | 0.10  | 111 (0.7%)     | 098 (0.6%)     | 0.01  |
| Psychosis; n (%)                                               | 3,685 (1.8%)    | 109 (0.6%)     | 0.11  | 095 (0.6%)     | 096 (0.6%)     | 0.00  |
| Other Medications                                              |                 |                |       |                |                |       |
| Angiotensin converting enzyme inhibitors; n (%)                | 94,923 (47.0%)  | 8,625 (45.7%)  | 0.03  | 7,558 (46.0%)  | 7,487 (45.5%)  | 0.01  |

|                                                         |                 |                |       |                |                |       |
|---------------------------------------------------------|-----------------|----------------|-------|----------------|----------------|-------|
| Angiotensin II receptor blockers; n (%)                 | 62,114 (30.8%)  | 5,703 (30.2%)  | 0.01  | 4,904 (29.8%)  | 4,943 (30.1%)  | -0.01 |
| Beta-blockers; n (%)                                    | 84,388 (41.8%)  | 6,146 (32.6%)  | 0.19  | 5,405 (32.9%)  | 5,414 (32.9%)  | 0.00  |
| Calcium-channel blockers; n (%)                         | 62,990 (31.2%)  | 4,401 (23.3%)  | 0.18  | 3,912 (23.8%)  | 3,937 (23.9%)  | 0.00  |
| Thiazide diuretics; n (%)                               | 28,977 (14.4%)  | 2,302 (12.2%)  | 0.06  | 2,043 (12.4%)  | 2,015 (12.3%)  | 0.00  |
| Loop diuretics; n (%)                                   | 32,075 (15.9%)  | 1,805 (9.6%)   | 0.19  | 1,668 (10.1%)  | 1,599 (9.7%)   | 0.01  |
| Other diuretics; n (%)                                  | 7,413 (3.7%)    | 561 (3.0%)     | 0.04  | 491 (3.0%)     | 479 (2.9%)     | 0.01  |
| Nitrates; n (%)                                         | 15,194 (7.5%)   | 897 (4.8%)     | 0.11  | 832 (5.1%)     | 805 (4.9%)     | 0.01  |
| Other hypertension drugs; n (%)                         | 15,264 (7.6%)   | 907 (4.8%)     | 0.12  | 810 (4.9%)     | 809 (4.9%)     | 0.00  |
| Digoxin; n (%)                                          | 5,112 (2.5%)    | 233 (1.2%)     | 0.10  | 213 (1.3%)     | 209 (1.3%)     | 0.00  |
| Anti-arrhythmics; n (%)                                 | 4,154 (2.1%)    | 209 (1.1%)     | 0.08  | 212 (1.3%)     | 189 (1.1%)     | 0.02  |
| COPD or asthma medications; n (%)                       | 44,456 (22.0%)  | 3,810 (20.2%)  | 0.04  | 3,438 (20.9%)  | 3,342 (20.3%)  | 0.01  |
| Statins; n (%)                                          | 141,955 (70.3%) | 12,673 (67.1%) | 0.07  | 10,925 (66.4%) | 10,963 (66.7%) | -0.01 |
| Other lipid-lowering drugs; n (%)                       | 27,330 (13.5%)  | 2,914 (15.4%)  | -0.05 | 2,439 (14.8%)  | 2,468 (15.0%)  | -0.01 |
| Antiplatelet agents; n (%)                              | 27,928 (13.8%)  | 1,974 (10.5%)  | 0.10  | 1,710 (10.4%)  | 1,756 (10.7%)  | -0.01 |
| Oral anticoagulants; n (%)                              | 16,341 (8.1%)   | 889 (4.7%)     | 0.14  | 807 (4.9%)     | 795 (4.8%)     | 0.00  |
| Heparin and other low-molecular weight heparins; n (%)  | 1,000 (0.5%)    | 37 (0.2%)      | 0.05  | 034 (0.2%)     | 33 (0.2%)      | 0.00  |
| Nonsteroidal anti-inflammatory drugs; n (%)             | 48,513 (24.0%)  | 4,674 (24.8%)  | -0.02 | 4,008 (24.4%)  | 4,091 (24.9%)  | -0.01 |
| Oral corticosteroids; n (%)                             | 51,411 (25.5%)  | 4,391 (23.3%)  | 0.05  | 3,927 (23.9%)  | 3,818 (23.2%)  | 0.02  |
| Bisphosphonates; n (%)                                  | 6,128 (3.0%)    | 165 (0.9%)     | 0.15  | 146 (0.9%)     | 153 (0.9%)     | 0.00  |
| Opioids; n (%)                                          | 65,752 (32.6%)  | 6,096 (32.3%)  | 0.01  | 5,417 (32.9%)  | 5,311 (32.3%)  | 0.01  |
| Antidepressants; n (%)                                  | 52,146 (25.8%)  | 4,954 (26.2%)  | -0.01 | 4,285 (26.1%)  | 4,269 (26.0%)  | 0.00  |
| Antipsychotics; n (%)                                   | 5,884 (2.9%)    | 385 (2.0%)     | 0.06  | 349 (2.1%)     | 335 (2.0%)     | 0.01  |
| Anticonvulsants; n (%)                                  | 33,841 (16.8%)  | 2,798 (14.8%)  | 0.05  | 2,483 (15.1%)  | 2,439 (14.8%)  | 0.01  |
| Benzodiazepines; n (%)                                  | 27,324 (13.5%)  | 2,550 (13.5%)  | 0.00  | 2,291 (13.9%)  | 2,232 (13.6%)  | 0.01  |
| Other anxiolytics or hypnotics; n (%)                   | 14,987 (7.4%)   | 1,474 (7.8%)   | -0.02 | 1,262 (7.7%)   | 1,269 (7.7%)   | 0.00  |
| Dementia medications; n (%)                             | 6,757 (3.3%)    | 127 (0.7%)     | 0.19  | 119 (0.7%)     | 125 (0.8%)     | -0.01 |
| Antiparkinsonian medications; n (%)                     | 5,816 (2.9%)    | 408 (2.2%)     | 0.04  | 352 (2.1%)     | 354 (2.2%)     | -0.01 |
| <b>Measures of healthcare utilization</b>               |                 |                |       |                |                |       |
| Hospitalization within prior 30 days; n (%)             | 9,580 (4.7%)    | 163 (0.9%)     | 0.23  | 158 (1.0%)     | 156 (0.9%)     | 0.01  |
| Hospitalization during prior 31-365 days; n (%)         | 21,645 (10.7%)  | 1,328 (7.0%)   | 0.13  | 1,211 (7.4%)   | 1,173 (7.1%)   | 0.01  |
| No. hospitalizations; mean (sd)                         | 0.20 (0.60)     | 0.10 (0.38)    | 0.20  | 0.10 (0.45)    | 0.10 (0.38)    | 0.00  |
| No. hospital days; mean (sd)                            | 1.16 (4.92)     | 0.47 (2.41)    | 0.18  | 0.51 (2.96)    | 0.48 (2.43)    | 0.01  |
| No. emergency department visits; mean (sd)              | 0.73 (2.09)     | 0.35 (1.37)    | 0.22  | 0.36 (1.52)    | 0.36 (1.33)    | 0.00  |
| No. office visits; mean (sd)                            | 9.27 (7.12)     | 8.82 (6.38)    | 0.07  | 8.75 (6.76)    | 8.68 (6.33)    | 0.01  |
| Endocrinologist visit within prior 30 days; n (%)       | 13,729 (6.8%)   | 3,917 (20.7%)  | -0.41 | 2,504 (15.2%)  | 2,558 (15.6%)  | -0.01 |
| Endocrinologist visit during prior 31-365 days; n (%)   | 16,269 (8.1%)   | 3,990 (21.1%)  | -0.37 | 2,658 (16.2%)  | 2,699 (16.4%)  | -0.01 |
| No. endocrinologist visits; mean (sd)                   | 0.78 (4.11)     | 2.37 (7.23)    | -0.27 | 1.62 (5.65)    | 1.82 (6.54)    | -0.03 |
| Internal medicine visit within prior 30 days; n (%)     | 136,884 (67.8%) | 11,000 (58.3%) | 0.20  | 10,327 (62.8%) | 10,123 (61.6%) | 0.02  |
| Internal medicine visit during prior 31-365 days; n (%) | 170,181 (84.3%) | 15,340 (81.3%) | 0.08  | 13,642 (83.0%) | 13,578 (82.6%) | 0.01  |
| No. internal medicine visits; mean (sd)                 | 14.45 (18.08)   | 11.72 (14.90)  | 0.16  | 12.36 (15.28)  | 12.13 (15.12)  | 0.02  |
| Cardiologist visit within prior 30 days; n (%)          | 64,941 (32.2%)  | 4,654 (24.7%)  | 0.17  | 4,112 (25.0%)  | 4,074 (24.8%)  | 0.00  |
| Cardiologist visit during prior 31-365 days; n (%)      | 64,941 (32.2%)  | 4,654 (24.7%)  | 0.17  | 4,112 (25.0%)  | 4,074 (24.8%)  | 0.00  |
| No. cardiologist visits; mean (sd)                      | 2.62 (6.96)     | 1.65 (5.08)    | 0.16  | 1.72 (5.96)    | 1.67 (5.17)    | 0.01  |
| Electrocardiogram; n (%)                                | 90,386 (44.8%)  | 6,937 (36.7%)  | 0.17  | 6,218 (37.8%)  | 6,097 (37.1%)  | 0.01  |
| No. electrocardiograms, mean (sd)                       | 1.14 (2.13)     | 0.76 (1.58)    | 0.20  | 0.81 (1.59)    | 0.78 (1.59)    | 0.02  |

|                                                          |                  |                  |       |                   |                  |       |
|----------------------------------------------------------|------------------|------------------|-------|-------------------|------------------|-------|
| No. distinct medication prescriptions; mean (sd)         | 12.13 (5.92)     | 12.40 (5.99)     | -0.05 | 12.21 (6.08)      | 12.12 (5.90)     | 0.02  |
| Use of glucose test strips; n (%)                        | 10,613 (5.3%)    | 1,103 (5.8%)     | -0.02 | 900 (5.5%)        | 926 (5.6%)       | 0.00  |
| No. HbA1c tests ordered; mean (sd)                       | 2.29 (1.37)      | 2.38 (1.34)      | -0.07 | 2.34 (1.39)       | 2.34 (1.32)      | 0.00  |
| No. glucose tests ordered; mean (sd)                     | 0.73 (2.20)      | 0.79 (1.65)      | -0.03 | 0.74 (1.67)       | 0.74 (1.60)      | 0.00  |
| No. microalbuminuria tests ordered; mean (sd)            | 1.02 (1.36)      | 1.28 (1.56)      | -0.18 | 1.21 (1.48)       | 1.22 (1.51)      | -0.01 |
| No. creatinine tests ordered; mean (sd)                  | 0.13 (0.54)      | 0.10 (0.47)      | 0.06  | 0.09 (0.45)       | 0.10 (0.48)      | -0.02 |
| No. BUN tests ordered, mean (sd)                         | 0.08 (0.42)      | 0.05 (0.33)      | 0.08  | 0.05 (0.33)       | 0.05 (0.34)      | 0.00  |
| No. lipid tests; mean (sd)                               | 1.75 (1.46)      | 1.87 (1.57)      | -0.08 | 1.85 (1.66)       | 1.84 (1.50)      | 0.01  |
| <b>Laboratory test results<sup>‡</sup></b>               |                  |                  |       |                   |                  |       |
| HbA1c (%); mean (sd)                                     | 8.33 (1.78)      | 8.50 (1.77)      | -0.10 | 8.60 (1.86)       | 8.46 (1.77)      | 0.08  |
| Patients with HbA1c results available; n (%)             | 17,214 (19.3%)   | 2,649 (18.4%)    | 0.02  | 2,395 (19.7%)     | 2,091 (17.2%)    | 0.06  |
| Creatinine (mg/dl); mean (sd)                            | 0.97 (0.33)      | 0.88 (0.22)      | 0.32  | 0.90 (0.26)       | 0.89 (0.22)      | 0.04  |
| Patients with creatinine results available; n (%)        | 17,436 (19.6%)   | 2,812 (19.5%)    | 0.00  | 2,441 (20.1%)     | 2,197 (18.1%)    | 0.05  |
| BUN (mg/dl); mean (sd)                                   | 16,923 (19.0%)   | 2,725 (18.9%)    | 0.00  | 2,363 (19.4%)     | 2,131 (17.5%)    | 0.05  |
| Patients with BUN results available; n (%)               | 451.10 (8442.85) | 592.11 (9142.14) | -0.02 | 729.22 (10500.44) | 580.13 (8891.51) | 0.02  |
| Total cholesterol (mg/dl); mean (sd)                     | 176.96 (45.82)   | 176.69 (45.22)   | 0.01  | 179.36 (47.83)    | 177.42 (45.80)   | 0.04  |
| Patients with total cholesterol results available; n (%) | 15,478 (17.4%)   | 2,556 (17.8%)    | -0.01 | 2,195 (18.1%)     | 2,012 (16.5%)    | 0.04  |
| LDL level (mg/dl); mean (sd)                             | 89.89 (47.55)    | 87.41 (39.68)    | 0.06  | 91.14 (40.49)     | 88.07 (39.53)    | 0.08  |
| Patients with LDL results available; n (%)               | 16,147 (18.1%)   | 2,543 (17.7%)    | 0.01  | 2,243 (18.4%)     | 2,003 (16.5%)    | 0.05  |
| HDL level (mg/dl); mean (sd)                             | 46.32 (44.30)    | 44.07 (13.07)    | 0.07  | 43.98 (12.61)     | 44.24 (13.16)    | -0.02 |
| Patients with HDL results available; n (%)               | 15,345 (17.2%)   | 2,516 (17.5%)    | -0.01 | 2,179 (17.9%)     | 1,978 (16.3%)    | 0.04  |
| Triglyceride level (mg/dl); mean (sd)                    | 188.93 (155.56)  | 208.51 (219.01)  | -0.10 | 198.49 (154.47)   | 208.23 (226.49)  | -0.05 |
| Patients with triglyceride results available; n (%)      | 15,242 (17.1%)   | 2,532 (17.6%)    | -0.01 | 2,154 (17.7%)     | 1,992 (16.4%)    | 0.03  |

DPP-4: dipeptidyl peptidase-4; St. Diff: standardized differences; sd: standard deviation; Q: quarter; GLP-1 RA: glucagon-like peptide-1 receptor agonists; COPD: Chronic obstructive pulmonary disease; BUN: blood urea nitrogen;

HbA1c: hemoglobin A1c; LDL: low-density lipoprotein; HDL: high-density lipoproteins

\* Only available in Medicare fee-for-service

† Defined as patients without any use of glucose-lowering medications during the 12 months prior to cohort entry

‡ Only available in OptumClinformatics and Truven MarketScan

**Supplemental Table 2. Baseline characteristics of patients initiating empagliflozin vs. DPP-4i and SGLT2i vs. DPP-4i before and after 1:1 PS-matching**

| Baseline characteristics            | UNMATCHED                     |                         |              | PROPENSITY-SCORE MATCHED      |                        |              | UNMATCHED               |                         |              | PROPENSITY-SCORE MATCHED |                         |              |
|-------------------------------------|-------------------------------|-------------------------|--------------|-------------------------------|------------------------|--------------|-------------------------|-------------------------|--------------|--------------------------|-------------------------|--------------|
|                                     | Empagliflozin<br>(N = 18,810) | DPP-4i<br>(N = 288,177) | St.<br>Diff. | Empagliflozin<br>(N = 17,551) | DPP-4i<br>(N = 17,551) | St.<br>Diff. | SGLT2i<br>(N = 164,048) | DPP-4i<br>(N = 485,175) | St.<br>Diff. | SGLT2i<br>(N = 112,264)  | DPP-4i<br>(N = 112,264) | St.<br>Diff. |
| <b>Demographics</b>                 |                               |                         |              |                               |                        |              |                         |                         |              |                          |                         |              |
| Age; mean (sd)                      | 58.39 (8.93)                  | 67.45 (9.69)            | 0.97         | 58.71 (8.96)                  | 58.76 (9.09)           | 0.01         | 59.21 (8.78)            | 67.06 (9.86)            | 0.84         | 60.70 (8.91)             | 60.77 (9.15)            | 0.01         |
| Age categories                      |                               |                         |              |                               |                        |              |                         |                         |              |                          |                         |              |
| 18 - 54; n (%)                      | 6,902 (36.7%)                 | 46,480 (16.1%)          | -0.48        | 6,276 (35.8%)                 | 6,303 (35.9%)          | 0.00         | 56,385 (34.4%)          | 82,739 (17.1%)          | -0.40        | 34,021 (30.3%)           | 33,903 (30.2%)          | 0.00         |
| 55 - 64; n (%)                      | 5,860 (31.2%)                 | 44,638 (15.5%)          | -0.38        | 5,387 (30.7%)                 | 5,287 (30.1%)          | -0.01        | 47,339 (28.9%)          | 79,988 (16.5%)          | -0.30        | 29,684 (26.4%)           | 29,418 (26.2%)          | 0.00         |
| 65 - 74; n (%)                      | 4,723 (25.1%)                 | 115,854 (40.2%)         | 0.33         | 4,579 (26.1%)                 | 4,623 (26.3%)          | 0.00         | 47,465 (28.9%)          | 189,089 (39.0%)         | 0.21         | 36,804 (32.8%)           | 36,820 (32.8%)          | 0.00         |
| >= 75; n (%)                        | 1,325 (7.0%)                  | 81,205 (28.2%)          | 0.58         | 1,309 (7.5%)                  | 1,338 (7.6%)           | 0.00         | 12,859 (7.8%)           | 133,359 (27.5%)         | 0.53         | 11,755 (10.5%)           | 12,123 (10.8%)          | 0.01         |
| Male; n (%)                         | 10,135 (53.9%)                | 138,263 (48.0%)         | -0.12        | 9,441 (53.8%)                 | 9,435 (53.8%)          | 0.00         | 87,142 (53.1%)          | 234,014 (48.2%)         | -0.10        | 60,039 (53.5%)           | 60,336 (53.7%)          | 0.00         |
| Race*                               |                               |                         |              |                               |                        |              |                         |                         |              |                          |                         |              |
| White; n (%)                        | 3,777 (84.7%)                 | 121,352 (75.6%)         | -0.23        | 3,676 (84.5%)                 | 3,663 (84.2%)          | -0.01        | 39,081 (83.6%)          | 196,018 (74.9%)         | -0.22        | 31,107 (82.2%)           | 31,230 (82.5%)          | 0.01         |
| Black; n (%)                        | 296 (6.6%)                    | 17,407 (10.8%)          | 0.15         | 293 (6.7%)                    | 267 (6.1%)             | -0.02        | 3,334 (7.1%)            | 28,208 (10.8%)          | 0.13         | 2,933 (7.7%)             | 2,865 (7.6%)            | 0.00         |
| Asian; n (%)                        | 110 (2.5%)                    | 7,761 (4.8%)            | 0.12         | 110 (2.5%)                    | 124 (2.9%)             | 0.02         | 1,234 (2.6%)            | 13,770 (5.3%)           | 0.14         | 1,151 (3.0%)             | 1,134 (3.0%)            | 0.00         |
| Hispanic; n (%)                     | 83 (1.9%)                     | 7,055 (4.4%)            | 0.14         | 83 (1.9%)                     | 92 (2.1%)              | 0.01         | 1,224 (2.6%)            | 12,704 (4.9%)           | 0.12         | 1,113 (2.9%)             | 1,098 (2.9%)            | 0.00         |
| North American<br>Native; n (%)     | 18 (0.4%)                     | 1,036 (0.6%)            | 0.03         | 18 (0.4%)                     | 24 (0.6%)              | 0.03         | 185 (0.4%)              | 1,709 (0.7%)            | 0.04         | 163 (0.4%)               | 179 (0.5%)              | 0.01         |
| Other/Unknown; n<br>(%)             | 175 (3.9%)                    | 5,957 (3.7%)            | -0.01        | 170 (3.9%)                    | 180 (4.1%)             | 0.01         | 1,699 (3.6%)            | 9,262 (3.5%)            | -0.01        | 1,387 (3.7%)             | 1,348 (3.6%)            | -0.01        |
| Region                              |                               |                         |              |                               |                        |              |                         |                         |              |                          |                         |              |
| Northeast; n (%)                    | 2,620 (13.9%)                 | 49,984 (17.3%)          | 0.09         | 2,480 (14.1%)                 | 2,462 (14.0%)          | 0.00         | 22,200 (13.5%)          | 84,071 (17.3%)          | 0.11         | 16,065 (14.3%)           | 16,172 (14.4%)          | 0.00         |
| South; n (%)                        | 5,937 (31.6%)                 | 107,870 (37.4%)         | 0.12         | 5,622 (32.0%)                 | 5,638 (32.1%)          | 0.00         | 54,236 (33.1%)          | 180,024 (37.1%)         | 0.08         | 38,224 (34.0%)           | 38,286 (34.1%)          | 0.00         |
| Midwest; n (%)                      | 7,552 (40.1%)                 | 82,895 (28.8%)          | -0.24        | 6,941 (39.5%)                 | 6,848 (39.0%)          | -0.01        | 64,648 (39.4%)          | 137,369 (28.3%)         | -0.24        | 41,349 (36.8%)           | 41,107 (36.6%)          | 0.00         |
| West; n (%)                         | 2,641 (14.0%)                 | 46,769 (16.2%)          | 0.06         | 2,451 (14.0%)                 | 2,541 (14.5%)          | 0.01         | 22,222 (13.5%)          | 81,830 (16.9%)          | 0.09         | 16,158 (14.4%)           | 16,207 (14.4%)          | 0.00         |
| <b>Calendar time</b>                |                               |                         |              |                               |                        |              |                         |                         |              |                          |                         |              |
| Quarter and year of<br>cohort entry |                               |                         |              |                               |                        |              |                         |                         |              |                          |                         |              |
| ...Q2 2013; n (%)                   | -                             | -                       | -            | -                             | -                      | -            | 2028 (1.2%)             | 40,288 (8.3%)           | 0.34         | 1801 (1.6%)              | 1,701 (1.5%)            | -0.01        |
| ...Q3 2013; n (%)                   | -                             | -                       | -            | -                             | -                      | -            | 4,239 (2.6%)            | 37,805 (7.8%)           | 0.24         | 3,363 (3.0%)             | 3,115 (2.8%)            | -0.01        |
| ...Q4 2013; n (%)                   | -                             | -                       | -            | -                             | -                      | -            | 5,442 (3.3%)            | 36,356 (7.5%)           | 0.19         | 4,184 (3.7%)             | 3,954 (3.5%)            | -0.01        |
| ...Q1 2014; n (%)                   | -                             | -                       | -            | -                             | -                      | -            | 7,103 (4.3%)            | 39,056 (8.0%)           | 0.15         | 5,429 (4.8%)             | 5,118 (4.6%)            | -0.01        |
| ...Q2 2014; n (%)                   | -                             | -                       | -            | -                             | -                      | -            | 10,609 (6.5%)           | 40,492 (8.3%)           | 0.07         | 7,298 (6.5%)             | 7,141 (6.4%)            | 0.00         |
| ...Q3 2014; n (%)                   | 323 (1.7%)                    | 24,919 (8.6%)           | 0.32         | 73 (0.4%)                     | 77 (0.4%)              | 0.00         | 14,491 (8.8%)           | 37,532 (7.7%)           | -0.04        | 9,201 (8.2%)             | 9,261 (8.2%)            | 0.00         |
| ...Q4 2014; n (%)                   | 1,548 (8.2%)                  | 36,126 (12.5%)          | 0.14         | 407 (2.3%)                    | 409 (2.3%)             | 0.00         | 17,443 (10.6%)          | 35,455 (7.3%)           | -0.12        | 10,800 (9.6%)            | 10,903 (9.7%)           | 0.00         |
| ...Q1 2015; n (%)                   | 1,967 (10.5%)                 | 35,331 (12.3%)          | 0.06         | 1,069 (6.1%)                  | 1,074 (6.1%)           | 0.00         | 17,399 (10.6%)          | 34,416 (7.1%)           | -0.12        | 11,131 (9.9%)            | 11,238 (10.0%)          | 0.00         |
| ...Q2 2015; n (%)                   | 1,665 (8.9%)                  | 36,799 (12.8%)          | 0.13         | 883 (5.0%)                    | 888 (5.1%)             | 0.00         | 18,248 (11.1%)          | 35,535 (7.3%)           | -0.13        | 11,791 (10.5%)           | 11,723 (10.4%)          | 0.00         |
| ...Q3 2015; n (%)                   | 1,444 (7.7%)                  | 33,244 (11.5%)          | 0.13         | 868 (4.9%)                    | 832 (4.7%)             | 0.01         | 13,830 (8.4%)           | 31,880 (6.6%)           | -0.07        | 9,591 (8.5%)             | 9,674 (8.6%)            | 0.00         |
| ...Q4 2015; n (%)                   | 2,357 (12.5%)                 | 30,118 (10.5%)          | -0.06        | 1,281 (7.3%)                  | 1,337 (7.6%)           | -0.01        | 13,288 (8.1%)           | 28,766 (5.9%)           | -0.09        | 9,254 (8.2%)             | 9,363 (8.3%)            | 0.00         |
| ...Q1 2016; n (%)                   | 3,160 (16.8%)                 | 32,864 (11.4%)          | -0.16        | 1,655 (9.4%)                  | 1,690 (9.6%)           | -0.01        | 14,847 (9.1%)           | 31,356 (6.5%)           | -0.10        | 10,411 (9.3%)            | 10,582 (9.4%)           | 0.00         |
| ...Q2 2016; n (%)                   | 3,149 (16.7%)                 | 31,096 (10.8%)          | -0.17        | 1,762 (10.0%)                 | 1,723 (9.8%)           | 0.01         | 13,129 (8.0%)           | 29,767 (6.1%)           | -0.07        | 9,438 (8.4%)             | 9,697 (8.6%)            | 0.01         |
| ...Q3 2016; n (%)                   | 3,197 (17.0%)                 | 27,680 (9.6%)           | -0.22        | 1,786 (10.2%)                 | 1,754 (10.0%)          | 0.01         | 11,952 (7.3%)           | 26,471 (5.5%)           | -0.07        | 8,572 (7.6%)             | 8,794 (7.8%)            | 0.01         |
| <b>Burden of<br/>comorbidities</b>  |                               |                         |              |                               |                        |              |                         |                         |              |                          |                         |              |

|                                                                           |               |               |       |               |               |       |               |               |       |               |               |       |
|---------------------------------------------------------------------------|---------------|---------------|-------|---------------|---------------|-------|---------------|---------------|-------|---------------|---------------|-------|
| Combined comorbidity score; mean (sd)                                     | 2.20 (1.60)   | 2.97 (2.26)   | 0.39  | 2.19 (1.62)   | 2.19 (1.60)   | 0.00  | 2.08 (1.61)   | 2.86 (2.24)   | 0.40  | 2.15 (1.69)   | 2.17 (1.70)   | 0.01  |
| Frailty score, mean (sd)                                                  | 0.13 (0.04)   | 0.16 (0.05)   | 0.66  | 0.13 (0.04)   | 0.14 (0.04)   | 0.03  | 0.15 (0.04)   | 0.16 (0.05)   | 0.22  | 0.15 (0.04)   | 0.15 (0.04)   | 0.00  |
| No. distinct diagnoses; mean (sd)                                         | 5.37 (7.00)   | 6.28 (9.37)   | 0.11  | 5.37 (7.03)   | 5.43 (7.04)   | 0.01  | 3.66 (6.33)   | 4.88 (8.50)   | 0.16  | 3.93 (6.69)   | 3.97 (6.61)   | 0.01  |
| <b>Diabetes-related complications</b>                                     |               |               |       |               |               |       |               |               |       |               |               |       |
| Diabetic nephropathy; n (%)                                               | 1,481 (7.9%)  | 31,640(11.0%) | 0.11  | 1,353 (7.7%)  | 1,381 (7.9%)  | 0.01  | 11,014(6.7%)  | 47,947(9.9%)  | 0.12  | 7,637 (6.8%)  | 7,777 (6.9%)  | 0.00  |
| Diabetic retinopathy; n (%)                                               | 1,121 (6.0%)  | 20,973(7.3%)  | 0.05  | 1,033 (5.9%)  | 1,060 (6.0%)  | 0.00  | 11,524(7.0%)  | 36,576(7.5%)  | 0.02  | 7,421 (6.6%)  | 7,417 (6.6%)  | 0.00  |
| Diabetes with other ophthalmic conditions or ophthalmic procedures; n (%) | 683 (3.6%)    | 12,010(4.2%)  | 0.03  | 621 (3.5%)    | 610 (3.5%)    | 0.00  | 7,216(4.4%)   | 21,806(4.5%)  | 0.00  | 4,677 (4.2%)  | 4,598 (4.1%)  | -0.01 |
| Diabetic neuropathy; n (%)                                                | 3,206 (17.0%) | 52,972(18.4%) | 0.04  | 2,908 (16.6%) | 2,942 (16.8%) | 0.01  | 26,976(16.4%) | 83,971(17.3%) | 0.02  | 17,638(15.7%) | 17,604(15.7%) | 0.00  |
| Diabetes with peripheral circulatory disorders; n (%)                     | 756 (4.0%)    | 18,711(6.5%)  | 0.11  | 697 (4.0%)    | 663 (3.8%)    | -0.01 | 6,756(4.1%)   | 30,800(6.3%)  | 0.10  | 4,894 (4.4%)  | 4,869 (4.3%)  | 0.00  |
| Diabetic Foot; n (%)                                                      | 355 (1.9%)    | 7,314 (2.5%)  | 0.04  | 324 (1.8%)    | 297 (1.7%)    | -0.01 | 3,120 (1.9%)  | 12,353(2.5%)  | 0.04  | 2,117 (1.9%)  | 2,074 (1.8%)  | -0.01 |
| Lower extremity amputation; n (%)                                         | 57 (0.3%)     | 1,294 (0.4%)  | 0.02  | 52 (0.3%)     | 045 (0.3%)    | 0.00  | 449 (0.3%)    | 2,026 (0.4%)  | 0.02  | 321 (0.3%)    | 323 (0.3%)    | 0.00  |
| Skin infections; n (%)                                                    | 1,647 (8.8%)  | 27,043(9.4%)  | 0.02  | 1,525 (8.7%)  | 1,552 (8.8%)  | 0.00  | 14,600(8.9%)  | 45,707(9.4%)  | 0.02  | 9,807 (8.7%)  | 9,884 (8.8%)  | 0.00  |
| Foot ulcer; n (%)                                                         | 353 (1.9%)    | 7,364 (2.6%)  | 0.05  | 323 (1.8%)    | 294 (1.7%)    | -0.01 | 3,141 (1.9%)  | 12,521(2.6%)  | 0.05  | 2,136 (1.9%)  | 2,086 (1.9%)  | 0.00  |
| Erectile dysfunction; n (%)                                               | 869 (4.6%)    | 10,019(3.5%)  | -0.06 | 797 (4.5%)    | 795 (4.5%)    | 0.00  | 7,098(4.3%)   | 16,375(3.4%)  | -0.05 | 4,592 (4.1%)  | 4,633 (4.1%)  | 0.00  |
| Hypoglycemia; n (%)                                                       | 734 (3.9%)    | 14,531(5.0%)  | 0.05  | 672 (3.8%)    | 688 (3.9%)    | 0.01  | 7,374(4.5%)   | 25,102(5.2%)  | 0.03  | 4,820 (4.3%)  | 4,868 (4.3%)  | 0.00  |
| Hyperglycemia; n (%)                                                      | 1,156 (6.1%)  | 21,184(7.4%)  | 0.05  | 1,102 (6.3%)  | 1,131 (6.4%)  | 0.00  | 9,176(5.6%)   | 33,278(6.9%)  | 0.05  | 6,660 (5.9%)  | 6,655 (5.9%)  | 0.00  |
| Disorders of fluid electrolyte and acid-base balance; n (%)               | 1,070 (5.7%)  | 33,323(11.6%) | 0.21  | 1,011 (5.8%)  | 994 (5.7%)    | 0.00  | 9,837(6.0%)   | 55,179(11.4%) | 0.19  | 7,218 (6.4%)  | 7,269 (6.5%)  | 0.00  |
| Diabetic ketoacidosis; n (%)                                              | 52 (0.3%)     | 1,113 (0.4%)  | 0.02  | 47 (0.3%)     | 041 (0.2%)    | -0.02 | 550 (0.3%)    | 2,182 (0.4%)  | 0.02  | 377 (0.3%)    | 368 (0.3%)    | 0.00  |
| Hyperosmolar hyperglycemic nonketotic syndrome; n (%)                     | 94 (0.5%)     | 1,811 (0.6%)  | 0.01  | 090 (0.5%)    | 089 (0.5%)    | 0.00  | 847 (0.5%)    | 2,871 (0.6%)  | 0.01  | 602 (0.5%)    | 596 (0.5%)    | 0.00  |
| Diabetes with unspecified complication; n (%)                             | 1,178 (6.3%)  | 15,794(5.5%)  | -0.03 | 1,055 (6.0%)  | 1,036 (5.9%)  | 0.00  | 8,363 (5.1%)  | 23,191(4.8%)  | -0.01 | 5,502 (4.9%)  | 5,420 (4.8%)  | 0.00  |

| <b>Features of diabetes medication initiation and baseline diabetes therapy</b> |                |                 |       |                |                |       |                 |                 |       |                |                |       |
|---------------------------------------------------------------------------------|----------------|-----------------|-------|----------------|----------------|-------|-----------------|-----------------|-------|----------------|----------------|-------|
| No. antidiabetic drugs at cohort entry; mean (sd)                               | 2.29 (0.95)    | 2.14 (0.78)     | -0.17 | 2.24 (0.92)    | 2.23 (0.86)    | -0.01 | 2.35 (0.94)     | 2.15 (0.78)     | -0.23 | 2.39 (0.84)    | 2.38 (0.69)    | -0.01 |
| Naive new user†; n (%)                                                          | 1,370 (7.3%)   | 39,682 (13.8%)  | 0.21  | 1,363 (7.8%)   | 1,328 (7.6%)   | -0.01 | 12,303 (7.5%)   | 74,717 (15.4%)  | 0.25  | 7,858 (7.0%)   | 8,195 (7.3%)   | -0.02 |
| Monotherapy; n (%)                                                              | 1,120 (6.0%)   | 30,678 (10.6%)  | 0.17  | 1,120 (6.4%)   | 1,087 (6.2%)   | -0.01 | 10,991 (6.7%)   | 52,693 (10.9%)  | 0.45  | 7,522 (6.7%)   | 7,073 (6.3%)   | -0.01 |
| Dual therapy with metformin; n (%)                                              | 2,712 (14.4%)  | 48,445 (16.8%)  | 0.07  | 2,712 (15.5%)  | 2,661 (15.2%)  | -0.01 | 21,297 (13.0%)  | 78,130 (16.1%)  | 0.09  | 20,907 (18.6%) | 21,066 (18.8%) | 0.01  |
| Concomitant initiation or current use of metformin; n (%)                       | 11,270 (59.9%) | 180,569 (62.7%) | 0.06  | 10,636 (60.6%) | 10,383 (59.2%) | -0.03 | 102,797 (62.7%) | 304,518 (62.8%) | 0.00  | 83,633 (74.5%) | 83,119 (74.0%) | -0.01 |
| Concomitant initiation or current use of sulfonylureas; n (%)                   | 4,830 (25.7%)  | 94,551 (32.8%)  | 0.16  | 4,593 (26.2%)  | 4,687 (26.7%)  | 0.01  | 47,472 (28.9%)  | 162,758 (33.5%) | 0.10  | 38,400 (34.2%) | 38,505 (34.3%) | 0.00  |
| Concomitant initiation or current use of insulin; n (%)                         | 3,906 (20.8%)  | 30,112 (10.4%)  | -0.29 | 3,327 (19.0%)  | 3,333 (19.0%)  | 0.00  | 34,638 (21.1%)  | 48,263 (9.9%)   | -0.31 | 18,761 (16.7%) | 18,672 (16.6%) | 0.00  |
| Concomitant initiation or current use of GLP-1 RAs; n (%)                       | 2,923 (15.5%)  | 3,914 (1.4%)    | -0.52 | 1,938 (11.0%)  | 1,918 (10.9%)  | 0.00  | 23,170 (14.1%)  | 6,261 (1.3%)    | -0.49 | 5,063 (4.5%)   | 4,818 (4.3%)   | -0.01 |
| Concomitant initiation or current use of glitazones; n (%)                      | 1,232 (6.5%)   | 15,585 (5.4%)   | -0.05 | 1,117 (6.4%)   | 1,162 (6.6%)   | 0.01  | 11,458 (7.0%)   | 27,659 (5.7%)   | -0.05 | 8,122 (7.2%)   | 8,132 (7.2%)   | 0.00  |
| Past use of metformin; n (%)                                                    | 3,343 (17.8%)  | 42,577 (14.8%)  | -0.08 | 3,096 (17.6%)  | 3,189 (18.2%)  | 0.02  | 3,224 (2.0%)    | 71,012 (14.6%)  | 0.47  | 3,143 (2.8%)   | 3,310 (2.9%)   | 0.01  |
| Past use of sulfonylureas; n (%)                                                | 1,509 (8.0%)   | 28,018 (9.7%)   | 0.06  | 1,356 (7.7%)   | 1,342 (7.6%)   | 0.00  | 1,447 (0.9%)    | 49,017 (10.1%)  | 0.41  | 1,379 (1.2%)   | 1,568 (1.4%)   | 0.02  |
| Past use of insulin; n (%)                                                      | 1,542 (8.2%)   | 11,402 (4.0%)   | -0.18 | 1,323 (7.5%)   | 1,322 (7.5%)   | 0.00  | 1,477 (0.9%)    | 18,353 (3.8%)   | 0.19  | 1,322 (1.2%)   | 1,422 (1.3%)   | 0.01  |
| Past use of GLP-1 RAs; n (%)                                                    | 1,589 (8.4%)   | 5,350 (1.9%)    | -0.30 | 1,371 (7.8%)   | 1,302 (7.4%)   | -0.02 | 1,521 (0.9%)    | 8,998 (1.9%)    | 0.09  | 1,384 (1.2%)   | 1,584 (1.4%)   | 0.02  |
| Past use of glitazones; n (%)                                                   | 565 (3.0%)     | 6,829 (2.4%)    | -0.04 | 487 (2.8%)     | 485 (2.8%)     | 0.00  | 547 (0.3%)      | 13,746 (2.8%)   | 0.20  | 519 (0.5%)     | 570 (0.5%)     | 0.00  |
| Any use of meglitinides; n (%)                                                  | 224 (1.2%)     | 4,578 (1.6%)    | 0.03  | 208 (1.2%)     | 224 (1.3%)     | 0.01  | 2,372 (1.4%)    | 8,040 (1.7%)    | 0.02  | 1,676 (1.5%)   | 1,745 (1.6%)   | 0.01  |
| Any use of alpha-glucosidase inhibitors; n (%)                                  | 77 (0.4%)      | 1,614 (0.6%)    | 0.03  | 070 (0.4%)     | 085 (0.5%)     | 0.01  | 914 (0.6%)      | 2,887 (0.6%)    | 0.00  | 641 (0.6%)     | 668 (0.6%)     | 0.00  |
| <b>Life style factors</b>                                                       |                |                 |       |                |                |       |                 |                 |       |                |                |       |
| Obesity; n (%)                                                                  | 5,923 (31.5%)  | 65,007 (22.6%)  | -0.20 | 5,318 (30.3%)  | 5,240 (29.9%)  | -0.01 | 47,928 (29.2%)  | 100,589 (20.7%) | -0.20 | 29,503 (26.3%) | 29,654 (26.4%) | 0.00  |

|                                                             |               |                 |      |               |               |       |                |                 |      |                |                |       |
|-------------------------------------------------------------|---------------|-----------------|------|---------------|---------------|-------|----------------|-----------------|------|----------------|----------------|-------|
| Overweight; n (%)                                           | 876 (4.7%)    | 14,785 (5.1%)   | 0.02 | 814 (4.6%)    | 819 (4.7%)    | 0.00  | 6,241 (3.8%)   | 20,196 (4.2%)   | 0.02 | 4,501 (4.0%)   | 4,492 (4.0%)   | 0.00  |
| Smoking; n (%)                                              | 1,981 (10.5%) | 42,356 (14.7%)  | 0.13 | 1,882 (10.7%) | 1,937 (11.0%) | 0.01  | 16,860 (10.3%) | 64,538 (13.3%)  | 0.09 | 12,374 (11.0%) | 12,483 (11.1%) | 0.00  |
| Alcohol abuse or dependence; n (%)                          | 148 (0.8%)    | 2,808 (1.0%)    | 0.02 | 143 (0.8%)    | 161 (0.9%)    | 0.01  | 1,281 (0.8%)   | 4,644 (1.0%)    | 0.02 | 908 (0.8%)     | 931 (0.8%)     | 0.00  |
| Drug abuse or dependence; n (%)                             | 177 (0.9%)    | 3,706 (1.3%)    | 0.04 | 164 (0.9%)    | 188 (1.1%)    | 0.02  | 1,711 (1.0%)   | 5,535 (1.1%)    | 0.01 | 1,185 (1.1%)   | 1,151 (1.0%)   | -0.01 |
| <b>Other comorbidities at baseline</b>                      |               |                 |      |               |               |       |                |                 |      |                |                |       |
| History of cardiovascular disease; n (%)                    | 4,589 (24.4%) | 108,099 (37.5%) | 0.29 | 4,309 (24.6%) | 4,330 (24.7%) | 0.00  | 40,273 (24.5%) | 181,170 (37.3%) | 0.28 | 29,718 (26.5%) | 29,752 (26.5%) | 0.00  |
| Ischemic heart disease; n (%)                               | 3,368 (17.9%) | 75,326 (26.1%)  | 0.20 | 3,146 (17.9%) | 3,191 (18.2%) | 0.01  | 29,137 (17.8%) | 126,314 (26.0%) | 0.20 | 21,275 (19.0%) | 21,408 (19.1%) | 0.00  |
| Acute myocardial infarction; n (%)                          | 238 (1.3%)    | 6,369 (2.2%)    | 0.07 | 224 (1.3%)    | 219 (1.2%)    | -0.01 | 1,856 (1.1%)   | 10,300 (2.1%)   | 0.08 | 1,402 (1.2%)   | 1,396 (1.2%)   | 0.00  |
| Old myocardial infarction; n (%)                            | 435 (2.3%)    | 11,670 (4.0%)   | 0.10 | 411 (2.3%)    | 440 (2.5%)    | 0.01  | 3,668 (2.2%)   | 18,990 (3.9%)   | 0.10 | 2,779 (2.5%)   | 2,754 (2.5%)   | 0.00  |
| Unstable angina; n (%)                                      | 271 (1.4%)    | 6,959 (2.4%)    | 0.07 | 257 (1.5%)    | 274 (1.6%)    | 0.01  | 2,432 (1.5%)   | 11,645 (2.4%)   | 0.07 | 1,764 (1.6%)   | 1,800 (1.6%)   | 0.00  |
| Stable angina; n (%)                                        | 559 (3.0%)    | 12,602 (4.4%)   | 0.07 | 523 (3.0%)    | 533 (3.0%)    | 0.00  | 4,666 (2.8%)   | 20,472 (4.2%)   | 0.08 | 3,424 (3.0%)   | 3,447 (3.1%)   | 0.01  |
| Other chronic ischemic heart disease; n (%)                 | 3,173 (16.9%) | 70,714 (24.5%)  | 0.19 | 2,962 (16.9%) | 2,989 (17.0%) | 0.00  | 27,190 (16.6%) | 118,485 (24.4%) | 0.19 | 19,914 (17.7%) | 20,067 (17.9%) | 0.01  |
| Previous coronary revascularization; n (%)                  | 859 (4.6%)    | 22,416 (7.8%)   | 0.13 | 811 (4.6%)    | 819 (4.7%)    | 0.00  | 7,362 (4.5%)   | 36,456 (7.5%)   | 0.13 | 5,580 (5.0%)   | 5,614 (5.0%)   | 0.00  |
| Ischemic or hemorrhagic stroke; n (%)                       | 982 (5.2%)    | 28,919 (10.0%)  | 0.18 | 938 (5.3%)    | 924 (5.3%)    | 0.00  | 8,838 (5.4%)   | 48,361 (10.0%)  | 0.17 | 6,836 (6.1%)   | 6,818 (6.1%)   | 0.00  |
| Ischemic stroke; n (%)                                      | 982 (5.2%)    | 28,647 (9.9%)   | 0.18 | 930 (5.3%)    | 913 (5.2%)    | 0.00  | 8,755 (5.3%)   | 47,908 (9.9%)   | 0.17 | 6,771 (6.0%)   | 6,752 (6.0%)   | 0.00  |
| Transient ischemic attack; n (%)                            | 255 (1.4%)    | 7,258 (2.5%)    | 0.08 | 241 (1.4%)    | 251 (1.4%)    | 0.00  | 2,240 (1.4%)   | 12,193 (2.5%)   | 0.08 | 1,727 (1.5%)   | 1,684 (1.5%)   | 0.00  |
| Hemorrhagic stroke and other cerebrovascular disease; n (%) | 271 (1.4%)    | 8,899 (3.1%)    | 0.11 | 257 (1.5%)    | 281 (1.6%)    | 0.01  | 2,288 (1.4%)   | 14,702 (3.0%)   | 0.11 | 1,800 (1.6%)   | 1,848 (1.6%)   | 0.00  |
| Late effects of cerebrovascular disease or procedure; n (%) | 131 (0.7%)    | 6,107 (2.1%)    | 0.12 | 128 (0.7%)    | 120 (0.7%)    | 0.00  | 1,429 (0.9%)   | 10,460 (2.2%)   | 0.11 | 1,139 (1.0%)   | 1,167 (1.0%)   | 0.00  |
| Heart failure; n (%)                                        | 917 (4.9%)    | 31,877 (11.1%)  | 0.23 | 870 (5.0%)    | 852 (4.9%)    | 0.00  | 8,112 (4.9%)   | 53,077 (10.9%)  | 0.22 | 6,330 (5.6%)   | 6,364 (5.7%)   | 0.00  |
| Peripheral arterial disease or surgery; n (%)               | 954 (5.1%)    | 30,515 (10.6%)  | 0.21 | 913 (5.2%)    | 941 (5.4%)    | 0.01  | 9,406 (5.7%)   | 51,813 (10.7%)  | 0.18 | 7,175 (6.4%)   | 7,194 (6.4%)   | 0.00  |
| Atrial fibrillation; n (%)                                  | 907 (4.8%)    | 28,538 (9.9%)   | 0.20 | 867 (4.9%)    | 867 (4.9%)    | 0.00  | 8,153 (5.0%)   | 46,447 (9.6%)   | 0.18 | 6,283 (5.6%)   | 6,304 (5.6%)   | 0.00  |

|                                                                |                |                 |       |                |                |       |                 |                 |       |                |                |       |
|----------------------------------------------------------------|----------------|-----------------|-------|----------------|----------------|-------|-----------------|-----------------|-------|----------------|----------------|-------|
| Other cardiac dysrhythmia; n (%)                               | 1,462 (7.8%)   | 36,588 (12.7%)  | 0.16  | 1,372 (7.8%)   | 1,368 (7.8%)   | 0.00  | 11,136 (6.8%)   | 56,323 (11.6%)  | 0.17  | 8,442 (7.5%)   | 8,506 (7.6%)   | 0.00  |
| Other cardiovascular disease; n (%)                            | 1,823 (9.7%)   | 48,045 (16.7%)  | 0.21  | 1,728 (9.8%)   | 1,703 (9.7%)   | 0.00  | 15,431 (9.4%)   | 78,969 (16.3%)  | 0.21  | 11,703 (10.4%) | 11,651 (10.4%) | 0.00  |
| Hypertension; n (%)                                            | 14,366 (76.4%) | 238,781 (82.9%) | 0.16  | 13,362 (76.1%) | 13,373 (76.2%) | 0.00  | 124,501 (75.9%) | 394,919 (81.4%) | 0.13  | 85,655 (76.3%) | 85,792 (76.4%) | 0.00  |
| Hyperlipidemia ; n (%)                                         | 15,099 (80.3%) | 235,991 (81.9%) | 0.04  | 14,024 (79.9%) | 14,031 (79.9%) | 0.00  |                 |                 |       |                |                |       |
| Edema; n (%)                                                   | 1,319 (7.0%)   | 31,618 (11.0%)  | 0.14  | 1,232 (7.0%)   | 1,246 (7.1%)   | 0.00  | 130,984 (79.8%) | 392,265 (80.9%) | 0.03  | 89,143 (79.4%) | 89,264 (79.5%) | 0.00  |
| Non-diabetic renal dysfunction; n (%)                          | 1,969 (10.5%)  | 68,101 (23.6%)  | 0.35  | 1,890 (10.8%)  | 1,900 (10.8%)  | 0.00  | 11,820 (7.2%)   | 51,791 (10.7%)  | 0.12  | 8,374 (7.5%)   | 8,435 (7.5%)   | 0.00  |
| Acute kidney injury; n (%)                                     | 282 (1.5%)     | 15,943 (5.5%)   | 0.22  | 278 (1.6%)     | 278 (1.6%)     | 0.00  | 16,396 (10.0%)  | 108,974 (22.5%) | 0.34  | 12,826 (11.4%) | 13,347 (11.9%) | 0.02  |
| Chronic kidney disease; n (%)                                  | 1,257 (6.7%)   | 51,475 (17.9%)  | 0.35  | 1,221 (7.0%)   | 1,270 (7.2%)   | 0.01  | 2,445 (1.5%)    | 25,203 (5.2%)   | 0.21  | 2,000 (1.8%)   | 2,057 (1.8%)   | 0.00  |
| Chronic kidney disease stage 1-2; n (%)                        | 471 (2.5%)     | 10,756 (3.7%)   | 0.07  | 444 (2.5%)     | 464 (2.6%)     | 0.01  | 10,302 (6.3%)   | 81,590 (16.8%)  | 0.33  | 8,331 (7.4%)   | 8,825 (7.9%)   | 0.02  |
| Chronic kidney disease stage 3+ or dialysis; n (%)             | 655 (3.5%)     | 36,002 (12.5%)  | 0.34  | 648 (3.7%)     | 631 (3.6%)     | -0.01 | 3,602 (2.2%)    | 16,998 (3.5%)   | 0.08  | 2,634 (2.3%)   | 2,713 (2.4%)   | 0.01  |
| Hypertensive nephropathy; n (%)                                | 511 (2.7%)     | 25,135 (8.7%)   | 0.26  | 497 (2.8%)     | 502 (2.9%)     | 0.01  | 5,423 (3.3%)    | 55,766 (11.5%)  | 0.32  | 4,698 (4.2%)   | 4,813 (4.3%)   | 0.00  |
| Miscellaneous renal insufficiency ; n (%)                      | 737 (3.9%)     | 25,517 (8.9%)   | 0.21  | 695 (4.0%)     | 682 (3.9%)     | -0.01 | 4,281 (2.6%)    | 39,692 (8.2%)   | 0.25  | 3,550 (3.2%)   | 3,622 (3.2%)   | 0.00  |
| Kidney or bladder stones; n (%)                                | 686 (3.6%)     | 11,176 (3.9%)   | 0.02  | 642 (3.7%)     | 639 (3.6%)     | -0.01 | 6,460 (3.9%)    | 42,203 (8.7%)   | 0.20  | 5,033 (4.5%)   | 5,030 (4.5%)   | 0.00  |
| Urinary tract infections; n (%)                                | 1,703 (9.1%)   | 45,478 (15.8%)  | 0.20  | 1,599 (9.1%)   | 1,597 (9.1%)   | 0.00  | 5,505 (3.4%)    | 17,822 (3.7%)   | 0.02  | 3,871 (3.4%)   | 3,895 (3.5%)   | 0.01  |
| COPD; n (%)                                                    | 1,051 (5.6%)   | 31,878 (11.1%)  | 0.20  | 1,013 (5.8%)   | 1,065 (6.1%)   | 0.01  | 16,284 (9.9%)   | 76,214 (15.7%)  | 0.17  | 11,865 (10.6%) | 11,908 (10.6%) | 0.00  |
| Asthma; n (%)                                                  | 1,370 (7.3%)   | 24,144 (8.4%)   | 0.04  | 1,288 (7.3%)   | 1,278 (7.3%)   | 0.00  | 10,194 (6.2%)   | 53,442 (11.0%)  | 0.17  | 7,798 (6.9%)   | 7,817 (7.0%)   | 0.00  |
| Obstructive sleep apnea; n (%)                                 | 2,862 (15.2%)  | 29,913 (10.4%)  | -0.14 | 2,568 (14.6%)  | 2,512 (14.3%)  | -0.01 | 12,197 (7.4%)   | 39,751 (8.2%)   | 0.03  | 8,282 (7.4%)   | 8,238 (7.3%)   | 0.00  |
| Pneumonia; n (%)                                               | 459 (2.4%)     | 12,541 (4.4%)   | 0.11  | 427 (2.4%)     | 442 (2.5%)     | 0.01  | 23,404 (14.3%)  | 47,532 (9.8%)   | -0.14 | 14,326 (12.8%) | 14,270 (12.7%) | 0.00  |
| Liver disease; n (%)                                           | 1,410 (7.5%)   | 20,368 (7.1%)   | -0.02 | 1,317 (7.5%)   | 1,323 (7.5%)   | 0.00  | 4,182 (2.5%)    | 21,125 (4.4%)   | 0.10  | 3,011 (2.7%)   | 2,964 (2.6%)   | -0.01 |
| Osteoarthritis; n (%)                                          | 3,150 (16.7%)  | 70,423 (24.4%)  | 0.19  | 2,969 (16.9%)  | 2,994 (17.1%)  | 0.01  | 11,298 (6.9%)   | 32,850 (6.8%)   | 0.00  | 7,630 (6.8%)   | 7,560 (6.7%)   | 0.00  |
| Other arthritis, arthropathies and musculoskeletal pain; n (%) | 8,276 (44.0%)  | 144,088 (50.0%) | 0.12  | 7,701 (43.9%)  | 7,748 (44.1%)  | 0.00  | 28,694 (17.5%)  | 115,846 (23.9%) | 0.16  | 20,752 (18.5%) | 20,804 (18.5%) | 0.00  |
| Dorsopathies; n (%)                                            | 5,266 (28.0%)  | 91,295 (31.7%)  | 0.08  | 4,929 (28.1%)  | 4,989 (28.4%)  | 0.01  | 72,572 (44.2%)  | 239,233 (49.3%) | 0.10  | 49,724 (44.3%) | 49,777 (44.3%) | 0.00  |
| Fractures; n (%)                                               | 585 (3.1%)     | 12,785 (4.4%)   | 0.07  | 556 (3.2%)     | 541 (3.1%)     | -0.01 | 46,869 (28.6%)  | 149,846 (30.9%) | 0.05  | 31,953 (28.5%) | 31,833 (28.4%) | 0.00  |
| Falls; n (%)                                                   | 388 (2.1%)     | 12,675 (4.4%)   | 0.13  | 363 (2.1%)     | 375 (2.1%)     | 0.00  | 5,201 (3.2%)    | 20,891 (4.3%)   | 0.06  | 3,688 (3.3%)   | 3,642 (3.2%)   | -0.01 |
| Osteoporosis; n (%)                                            | 574 (3.1%)     | 22,194 (7.7%)   | 0.20  | 555 (3.2%)     | 564 (3.2%)     | 0.00  | 3,430 (2.1%)    | 19,465 (4.0%)   | 0.11  | 2,614 (2.3%)   | 2,625 (2.3%)   | 0.00  |
| Disorders of thyroid gland; n (%)                              | 1,364 (7.3%)   | 18,368 (6.4%)   | -0.04 | 1,210 (6.9%)   | 1,231 (7.0%)   | 0.00  | 5,942 (3.6%)    | 39,053 (8.0%)   | 0.19  | 4,745 (4.2%)   | 4,662 (4.2%)   | 0.00  |
| Depression; n (%)                                              | 2,126 (11.3%)  | 37,340 (13.0%)  | 0.05  | 1,970 (11.2%)  | 1,957 (11.2%)  | 0.00  | 10,305 (6.3%)   | 29,971 (6.2%)   | 0.00  | 6,552 (5.8%)   | 6,550 (5.8%)   | 0.00  |
|                                                                |                |                 |       |                |                |       | 19,375 (11.8%)  | 61,316 (12.6%)  | 0.02  | 12,999 (11.6%) | 12,876 (11.5%) | 0.00  |



|                                                        |                |                 |       |                |                |       |                 |                 |       |                |                |       |
|--------------------------------------------------------|----------------|-----------------|-------|----------------|----------------|-------|-----------------|-----------------|-------|----------------|----------------|-------|
| Anxiety; n (%)                                         | 1,858 (9.9%)   | 30,680 (10.6%)  | 0.02  | 1,741 (9.9%)   | 1,764 (10.1%)  | 0.01  | 15,070 (9.2%)   | 47,812 (9.9%)   | 0.02  | 10,273 (9.2%)  | 10,173 (9.1%)  | 0.00  |
| Sleep disorders; n (%)                                 | 3,029 (16.1%)  | 42,188 (14.6%)  | -0.04 | 2,770 (15.8%)  | 2,694 (15.3%)  | -0.01 | 29,591 (18.0%)  | 72,325 (14.9%)  | -0.08 | 18,672 (16.6%) | 18,452 (16.4%) | -0.01 |
| Dementia; n (%)                                        | 264 (1.4%)     | 16,212 (5.6%)   | 0.23  | 255 (1.5%)     | 270 (1.5%)     | 0.00  | 2,647 (1.6%)    | 26,336 (5.4%)   | 0.21  | 2,237 (2.0%)   | 2,297 (2.0%)   | 0.00  |
| Delirium; n (%)                                        | 103 (0.5%)     | 4,794 (1.7%)    | 0.12  | 99 (0.6%)      | 109 (0.6%)     | 0.00  | 1,007 (0.6%)    | 7,653 (1.6%)    | 0.10  | 790 (0.7%)     | 811 (0.7%)     | 0.00  |
| Psychosis; n (%)                                       | 109 (0.6%)     | 5,336 (1.9%)    | 0.12  | 104 (0.6%)     | 091 (0.5%)     | -0.01 | 1,262 (0.8%)    | 9,035 (1.9%)    | 0.10  | 1,009 (0.9%)   | 1,014 (0.9%)   | 0.00  |
| <b>Other Medications</b>                               |                |                 |       |                |                |       |                 |                 |       |                |                |       |
| Angiotensin converting enzyme inhibitors; n (%)        | 8,595 (45.7%)  | 134,384 (46.6%) | 0.02  | 8,009 (45.6%)  | 8,002 (45.6%)  | 0.00  | 75,849 (46.2%)  | 228,628 (47.1%) | 0.02  | 52,852 (47.1%) | 52,943 (47.2%) | 0.00  |
| Angiotensin II receptor blockers; n (%)                | 5,680 (30.2%)  | 90,032 (31.2%)  | 0.02  | 5,255 (29.9%)  | 5,259 (30.0%)  | 0.00  | 49,637 (30.3%)  | 149,457 (30.8%) | 0.01  | 33,455 (29.8%) | 33,548 (29.9%) | 0.00  |
| Beta-blockers; n (%)                                   | 6,122 (32.5%)  | 121,709 (42.2%) | 0.20  | 5,729 (32.6%)  | 5,640 (32.1%)  | -0.01 | 53,120 (32.4%)  | 202,895 (41.8%) | 0.20  | 38,089 (33.9%) | 37,996 (33.8%) | 0.00  |
| Calcium-channel blockers; n (%)                        | 4,383 (23.3%)  | 91,041 (31.6%)  | 0.19  | 4,137 (23.6%)  | 4,139 (23.6%)  | 0.00  | 39,876 (24.3%)  | 152,237 (31.4%) | 0.16  | 28,600 (25.5%) | 28,564 (25.4%) | 0.00  |
| Thiazide diuretics; n (%)                              | 2,298 (12.2%)  | 41,436 (14.4%)  | 0.06  | 2,143 (12.2%)  | 2,072 (11.8%)  | -0.01 | 20,149 (12.3%)  | 69,207 (14.3%)  | 0.06  | 14,163 (12.6%) | 14,108 (12.6%) | 0.00  |
| Loop diuretics; n (%)                                  | 1,797 (9.6%)   | 47,777 (16.6%)  | 0.21  | 1,682 (9.6%)   | 1,632 (9.3%)   | -0.01 | 17,361 (10.6%)  | 80,726 (16.6%)  | 0.18  | 12,428 (11.1%) | 12,384 (11.0%) | 0.00  |
| Other diuretics; n (%)                                 | 558 (3.0%)     | 11,070 (3.8%)   | 0.04  | 516 (2.9%)     | 508 (2.9%)     | 0.00  | 4,772 (2.9%)    | 17,896 (3.7%)   | 0.04  | 3,193 (2.8%)   | 3,176 (2.8%)   | 0.00  |
| Nitrates; n (%)                                        | 893 (4.7%)     | 22,219 (7.7%)   | 0.12  | 850 (4.8%)     | 873 (5.0%)     | 0.01  | 7,963 (4.9%)    | 37,840 (7.8%)   | 0.12  | 5,901 (5.3%)   | 5,966 (5.3%)   | 0.00  |
| Other hypertension drugs; n (%)                        | 906 (4.8%)     | 22,944 (8.0%)   | 0.13  | 856 (4.9%)     | 854 (4.9%)     | 0.00  | 8,178 (5.0%)    | 38,674 (8.0%)   | 0.12  | 6,087 (5.4%)   | 6,135 (5.5%)   | 0.00  |
| Digoxin; n (%)                                         | 233 (1.2%)     | 7,330 (2.5%)    | 0.10  | 220 (1.3%)     | 213 (1.2%)     | -0.01 | 2,109 (1.3%)    | 13,343 (2.8%)   | 0.11  | 1,682 (1.5%)   | 1,721 (1.5%)   | 0.00  |
| Anti-arrhythmics; n (%)                                | 208 (1.1%)     | 6,171 (2.1%)    | 0.08  | 202 (1.2%)     | 201 (1.1%)     | -0.01 | 1,733 (1.1%)    | 9,951 (2.1%)    | 0.08  | 1,318 (1.2%)   | 1,277 (1.1%)   | -0.01 |
| COPD or asthma medications; n (%)                      | 3,798 (20.2%)  | 63,713 (22.1%)  | 0.05  | 3,526 (20.1%)  | 3,575 (20.4%)  | 0.01  | 34,506 (21.0%)  | 106,286 (21.9%) | 0.02  | 23,498 (20.9%) | 23,383 (20.8%) | 0.00  |
| Statins; n (%)                                         | 12,632 (67.2%) | 202,458 (70.3%) | 0.07  | 11,719 (66.8%) | 11,712 (66.7%) | 0.00  | 110,712 (67.5%) | 338,752 (69.8%) | 0.05  | 76,290 (68.0%) | 76,411 (68.1%) | 0.00  |
| Other lipid-lowering drugs; n (%)                      | 2,907 (15.5%)  | 39,875 (13.8%)  | -0.05 | 2,654 (15.1%)  | 2,693 (15.3%)  | 0.01  | 26,382 (16.1%)  | 70,597 (14.6%)  | -0.04 | 17,326 (15.4%) | 17,258 (15.4%) | 0.00  |
| Antiplatelet agents; n (%)                             | 1,966 (10.5%)  | 41,025 (14.2%)  | 0.11  | 1,844 (10.5%)  | 1,807 (10.3%)  | -0.01 | 17,351 (10.6%)  | 69,643 (14.4%)  | 0.12  | 12,508 (11.1%) | 12,415 (11.1%) | 0.00  |
| Oral anticoagulants; n (%)                             | 882 (4.7%)     | 23,413 (8.1%)   | 0.14  | 830 (4.7%)     | 844 (4.8%)     | 0.00  | 7,751 (4.7%)    | 38,224 (7.9%)   | 0.13  | 5,806 (5.2%)   | 5,764 (5.1%)   | 0.00  |
| Heparin and other low-molecular weight heparins; n (%) | 037 (0.2%)     | 1,415 (0.5%)    | 0.05  | 036 (0.2%)     | 034 (0.2%)     | 0.00  | 442 (0.3%)      | 2,472 (0.5%)    | 0.03  | 348 (0.3%)     | 337 (0.3%)     | 0.00  |
| Nonsteroidal anti-inflammatory drugs; n (%)            | 4,660 (24.8%)  | 69,644 (24.2%)  | -0.01 | 4,344 (24.8%)  | 4,387 (25.0%)  | 0.00  | 41,918 (25.6%)  | 118,174 (24.4%) | -0.03 | 28,251 (25.2%) | 28,327 (25.2%) | 0.00  |
| Oral corticosteroids; n (%)                            | 4,370 (23.2%)  | 73,762 (25.6%)  | 0.06  | 4,074 (23.2%)  | 4,052 (23.1%)  | 0.00  | 38,115 (23.2%)  | 121,816 (25.1%) | 0.04  | 26,261 (23.4%) | 26,206 (23.3%) | 0.00  |
| Bisphosphonates; n (%)                                 | 164 (0.9%)     | 9,018 (3.1%)    | 0.16  | 161 (0.9%)     | 154 (0.9%)     | 0.00  | 2,242 (1.4%)    | 16,859 (3.5%)   | 0.14  | 1,856 (1.7%)   | 1,817 (1.6%)   | -0.01 |

|                                                         |               |                 |       |               |               |       |                 |                 |       |               |               |       |
|---------------------------------------------------------|---------------|-----------------|-------|---------------|---------------|-------|-----------------|-----------------|-------|---------------|---------------|-------|
| Opioids; n (%)                                          | 6,081 (32.3%) | 94,304(32.7%)   | 0.01  | 5,673 (32.3%) | 5,698 (32.5%) | 0.00  | 55,942(34.1%)   | 162,128 (33.4%) | -0.01 | 37,167(33.1%) | 37,075(33.0%) | 0.00  |
| Antidepressants; n (%)                                  | 4,946 (26.3%) | 74,054(25.7%)   | -0.01 | 4,553 (25.9%) | 4,580 (26.1%) | 0.00  | 44,514(27.1%)   | 122,946 (25.3%) | -0.04 | 29,152(26.0%) | 28,871(25.7%) | -0.01 |
| Antipsychotics; n (%)                                   | 384 (2.0%)    | 8,362 (2.9%)    | 0.06  | 356 (2.0%)    | 337 (1.9%)    | -0.01 | 3,502 (2.1%)    | 14,369(3.0%)    | 0.06  | 2,456 (2.2%)  | 2,420 (2.2%)  | 0.00  |
| Anticonvulsants; n (%)                                  | 2,789 (14.8%) | 48,863(17.0%)   | 0.06  | 2,592 (14.8%) | 2,529 (14.4%) | -0.01 | 25,723(15.7%)   | 78,984(16.3%)   | 0.02  | 17,210(15.3%) | 17,109(15.2%) | 0.00  |
| Benzodiazepines; n (%)                                  | 2,543 (13.5%) | 39,343(13.7%)   | 0.01  | 2,373 (13.5%) | 2,367 (13.5%) | 0.00  | 21,981(13.4%)   | 65,640(13.5%)   | 0.00  | 14,612(13.0%) | 14,499(12.9%) | 0.00  |
| Other anxiolytics or hypnotics; n (%)                   | 1,470 (7.8%)  | 21,687(7.5%)    | -0.01 | 1,349 (7.7%)  | 1,278 (7.3%)  | -0.02 | 13,587(8.3%)    | 40,166(8.3%)    | 0.00  | 8,970 (8.0%)  | 8,940 (8.0%)  | 0.00  |
| Dementia medications; n (%)                             | 127 (0.7%)    | 9,908 (3.4%)    | 0.19  | 125 (0.7%)    | 122 (0.7%)    | 0.00  | 1,471 (0.9%)    | 16,761 (3.5%)   | 0.18  | 1,289 (1.1%)  | 1,255 (1.1%)  | 0.00  |
| Antiparkinsonian medications; n (%)                     | 407 (2.2%)    | 8,435 (2.9%)    | 0.04  | 373 (2.1%)    | 389 (2.2%)    | 0.01  | 3,973 (2.4%)    | 14,091 (2.9%)   | 0.03  | 2,741 (2.4%)  | 2,753 (2.5%)  | 0.01  |
| <b>Measures of healthcare utilization</b>               |               |                 |       |               |               |       |                 |                 |       |               |               |       |
| Hospitalization within prior 30 days; n (%)             | 160 (0.9%)    | 12,925(4.5%)    | 0.22  | 157 (0.9%)    | 152 (0.9%)    | 0.00  | 1,496 (0.9%)    | 21,899(4.5%)    | 0.22  | 1,338 (1.2%)  | 1,326 (1.2%)  | 0.00  |
| Hospitalization during prior 31-365 days; n (%)         | 1,321 (7.0%)  | 31,597(11.0%)   | 0.14  | 1,240 (7.1%)  | 1,315 (7.5%)  | 0.02  | 11,620(7.1%)    | 53,797(11.1%)   | 0.14  | 8,316 (7.4%)  | 8,465 (7.5%)  | 0.00  |
| No. hospitalizations; mean (sd)                         | 0.10 (0.38)   | 0.20 (0.59)     | 0.20  | 0.10 (0.38)   | 0.10 (0.36)   | 0.00  | 0.10 (0.38)     | 0.20 (0.60)     | 0.20  | 0.11 (0.40)   | 0.11 (0.40)   | 0.00  |
| No. hospital days; mean (sd)                            | 0.47 (2.42)   | 1.16 (4.92)     | 0.18  | 0.47 (2.41)   | 0.47 (2.18)   | 0.00  | 0.48 (2.67)     | 1.16 (4.97)     | 0.17  | 0.52 (2.95)   | 0.54 (2.70)   | 0.01  |
| No. emergency department visits; mean (sd)              | 0.35 (1.37)   | 0.74 (2.06)     | 0.22  | 0.36 (1.31)   | 0.37 (1.40)   | 0.01  | 0.37 (1.45)     | 0.72 (2.04)     | 0.20  | 0.42 (1.52)   | 0.42 (1.47)   | 0.00  |
| No. office visits; mean (sd)                            | 8.81 (6.38)   | 9.45 (7.22)     | 0.09  | 8.70 (6.31)   | 8.75 (6.48)   | 0.01  | 8.89 (6.49)     | 9.59 (7.40)     | 0.10  | 8.73 (6.45)   | 8.72 (6.72)   | 0.00  |
| Endocrinologist visit within prior 30 days; n (%)       | 3,898 (20.7%) | 22,465(7.8%)    | -0.38 | 3,048 (17.4%) | 2,976 (17.0%) | -0.01 | 25,825(15.7%)   | 37,132(7.7%)    | -0.25 | 12,164(10.8%) | 12,023(10.7%) | 0.00  |
| Endocrinologist visit during prior 31-365 days; n (%)   | 3,971 (21.1%) | 25,758(8.9%)    | -0.35 | 3,171 (18.1%) | 3,157 (18.0%) | 0.00  | 29,327(17.9%)   | 42,499(8.8%)    | -0.27 | 13,704(12.2%) | 13,749(12.2%) | 0.00  |
| No. endocrinologist visits; mean (sd)                   | 2.36 (7.21)   | 0.89 (4.40)     | -0.25 | 2.02 (6.81)   | 1.77 (5.95)   | -0.04 | 2.00 (6.75)     | 0.90 (4.42)     | -0.19 | 1.37 (5.81)   | 1.20 (4.94)   | -0.03 |
| Internal medicine visit within prior 30 days; n (%)     | 10,960(58.3%) | 189,363 (65.7%) | 0.15  | 10,487(59.8%) | 10,524(60.0%) | 0.00  | 99,094(60.4%)   | 319,296 (65.8%) | 0.11  | 71,601(63.8%) | 71,634(63.8%) | 0.00  |
| Internal medicine visit during prior 31-365 days; n (%) | 15,287(81.3%) | 239,343 (83.1%) | 0.05  | 14,283(81.4%) | 14,334(81.7%) | 0.01  | 134,084 (81.7%) | 402,837 (83.0%) | 0.03  | 92,188(82.1%) | 92,163(82.1%) | 0.00  |

|                                                    |               |                 |       |               |                 |       |                  |                  |       |                  |                  |       |
|----------------------------------------------------|---------------|-----------------|-------|---------------|-----------------|-------|------------------|------------------|-------|------------------|------------------|-------|
| No. internal medicine visits; mean (sd)            | 11.72 (14.89) | 14.29 (18.37)   | 0.15  | 11.86 (15.02) | 11.96 (15.51)   | 0.01  | 12.48 (15.90)    | 14.47 (18.33)    | 0.12  | 12.94 (16.41)    | 12.66 (16.15)    | -0.02 |
| Cardiologist visit within prior 30 days; n (%)     | 1,199 (6.4%)  | 31,149 (10.8%)  | 0.16  | 1,117 (6.4%)  | 1,176 (6.7%)    | 0.01  | 9,954 (6.1%)     | 52,927 (10.9%)   | 0.17  | 7,403 (6.6%)     | 7,382 (6.6%)     | 0.00  |
| Cardiologist visit during prior 31-365 days; n (%) | 4,638 (24.7%) | 94,659 (32.8%)  | 0.18  | 4,341 (24.7%) | 4,337 (24.7%)   | 0.00  | 40,439 (24.7%)   | 157,278 (32.4%)  | 0.17  | 28,595 (25.5%)   | 28,730 (25.6%)   | 0.00  |
| No. cardiologist visits; mean (sd)                 | 1.65 (5.08)   | 2.73 (7.07)     | 0.18  | 1.66 (5.14)   | 1.63 (4.89)     | -0.01 | 1.65 (4.91)      | 2.76 (7.04)      | 0.18  | 1.77 (5.19)      | 1.78 (5.42)      | 0.00  |
| Electrocardiogram; n (%)                           | 6,915 (36.8%) | 130,035 (45.1%) | 0.17  | 6,474 (36.9%) | 6,483 (36.9%)   | 0.00  | 60,793 (37.1%)   | 218,733 (45.1%)  | 0.16  | 42,560 (37.9%)   | 42,951 (38.3%)   | 0.01  |
| No. electrocardiograms; mean (sd)                  | 0.76 (1.58)   | 1.15 (2.12)     | 0.21  | 0.77 (1.59)   | 0.77 (1.55)     | 0.00  | 0.76 (1.51)      | 1.14 (2.10)      | 0.21  | 0.80 (1.60)      | 0.80 (1.53)      | 0.00  |
| No. distinct medication prescriptions; mean (sd)   | 12.40 (6.00)  | 12.26 (6.00)    | -0.02 | 12.20 (5.92)  | 12.23 (6.14)    | 0.00  | 12.53 (6.01)     | 12.28 (6.05)     | -0.04 | 12.12 (5.77)     | 12.09 (6.07)     | -0.01 |
| Use of glucose test strips; n (%)                  | 1,100 (5.8%)  | 15,563 (5.4%)   | -0.02 | 1,012 (5.8%)  | 973 (5.5%)      | -0.01 | 9,609 (5.9%)     | 27,300 (5.6%)    | -0.01 | 6,225 (5.5%)     | 6,224 (5.5%)     | 0.00  |
| No. HbA1c tests ordered; mean (sd)                 | 2.38 (1.34)   | 2.30 (1.39)     | -0.06 | 2.35 (1.33)   | 2.36 (1.39)     | 0.01  | 2.37 (1.38)      | 2.27 (1.41)      | -0.07 | 2.30 (1.35)      | 2.30 (1.40)      | 0.00  |
| No. glucose tests ordered; mean (sd)               | 0.79 (1.66)   | 0.78 (3.02)     | 0.00  | 0.76 (1.63)   | 0.76 (1.77)     | 0.00  | 0.80 (1.78)      | 0.80 (2.90)      | 0.00  | 0.74 (1.75)      | 0.73 (1.77)      | -0.01 |
| No. microalbuminuria tests ordered; mean (sd)      | 1.28 (1.55)   | 1.03 (1.38)     | -0.17 | 1.24 (1.52)   | 1.23 (1.52)     | -0.01 | 1.20 (1.52)      | 1.01 (1.39)      | -0.13 | 1.13 (1.47)      | 1.14 (1.47)      | 0.01  |
| No. creatinine tests ordered; mean (sd)            | 0.10 (0.47)   | 0.12 (0.54)     | 0.04  | 0.09 (0.47)   | 0.10 (0.47)     | 0.02  | 0.10 (0.47)      | 0.13 (0.56)      | 0.06  | 0.10 (0.47)      | 0.10 (0.49)      | 0.00  |
| No. BUN tests ordered; mean (sd)                   | 0.05 (0.33)   | 0.08 (0.42)     | 0.08  | 0.05 (0.33)   | 0.06 (0.33)     | 0.03  | 0.05 (0.35)      | 0.08 (0.45)      | 0.07  | 0.05 (0.35)      | 0.06 (0.36)      | 0.03  |
| No. lipid tests; mean (sd)                         | 1.88 (1.57)   | 1.77 (1.48)     | -0.07 | 1.85 (1.51)   | 1.87 (1.68)     | 0.01  | 1.90 (1.61)      | 1.79 (1.49)      | -0.07 | 1.84 (1.53)      | 1.84 (1.60)      | 0.00  |
| <b>Laboratory test results<sup>‡</sup></b>         |               |                 |       |               |                 |       |                  |                  |       |                  |                  |       |
| HbA1c (%); mean (sd)                               | 8.50 (1.78)   | 8.38 (1.82)     | -0.07 | 8.49 (1.78)   | 8.63 (1.94)     | 0.08  | 8.62 (1.80)      | 8.37 (1.82)      | -0.14 | 8.60 (1.79)      | 8.57 (1.85)      | -0.02 |
| Patients with HbA1c results available; n (%)       | 2,637 (18.4%) | 28,325 (22.2%)  | 0.09  | 2,449 (18.6%) | 2,704 (20.5%)   | 0.05  | 21,349 (18.2%)   | 45,506 (20.4%)   | 0.06  | 13,696 (18.4%)   | 14,678 (19.7%)   | 0.03  |
| Creatinine (mg/dl); mean (sd)                      | 0.88 (0.22)   | 0.97 (0.34)     | 0.31  | 0.88 (0.22)   | 0.91 (0.30)     | 0.11  | 0.87 (0.22)      | 0.96 (0.33)      | 0.32  | 0.88 (0.23)      | 0.91 (0.27)      | 0.12  |
| Patients with creatinine results available; n (%)  | 2,799 (19.5%) | 29,223 (22.9%)  | 0.08  | 2,599 (19.7%) | 2,760 (20.9%)   | 0.03  | 22,671 (19.3%)   | 47,505 (21.3%)   | 0.05  | 14,364 (19.3%)   | 15,158 (20.4%)   | 0.03  |
| BUN (mg/dl); mean (sd)                             | 60.43 (65.34) | 198.26 (702.27) | 0.28  | 55.68 (59.72) | 120.38 (192.12) | 0.45  | 316.51 (6569.76) | 197.05 (5400.38) | -0.02 | 396.60 (7486.21) | 266.24 (5938.97) | -0.02 |

|                                                          |                 |                 |       |                |                |       |                 |                 |       |                |                |      |
|----------------------------------------------------------|-----------------|-----------------|-------|----------------|----------------|-------|-----------------|-----------------|-------|----------------|----------------|------|
| Patients with BUN results available; n (%)               | 2,713 (18.9%)   | 28,471 (22.3%)  | 0.08  | 2,524 (19.1%)  | 2,670 (20.2%)  | 0.03  | 22,109 (18.8%)  | 46,457 (20.8%)  | 0.05  | 14,020 (18.8%) | 14,755 (19.8%) | 0.03 |
| Total cholesterol (mg/dl); mean (sd)                     | 176.70(45.25)   | 178.78(47.25)   | 0.04  | 177.05(45.44)  | 179.86(48.83)  | 0.06  | 177.14(48.23)   | 177.36(49.33)   | 0.00  | 177.06(48.23)  | 179.28(50.55)  | 0.04 |
| Patients with total cholesterol results available; n (%) | 2,545 (17.7%)   | 26,076(20.4%)   | 0.07  | 2,377 (18.0%)  | 2,503 (19.0%)  | 0.03  | 20,568(17.5%)   | 42,530(19.0%)   | 0.04  | 13,093(17.6%)  | 13,849(18.6%)  | 0.03 |
| LDL level (mg/dl); mean (sd)                             | 87.37 (39.70)   | 90.36 (45.06)   | 0.07  | 87.54 (39.78)  | 90.24 (41.35)  | 0.07  | 87.44 (40.41)   | 89.64 (43.68)   | 0.05  | 87.62 (40.19)  | 89.81 (41.60)  | 0.05 |
| Patients with LDL results available; n (%)               | 2,532 (17.6%)   | 26,800(21.0%)   | 0.09  | 2,362 (17.9%)  | 2,563 (19.4%)  | 0.04  | 20,513(17.5%)   | 43,361(19.4%)   | 0.05  | 13,103(17.6%)  | 14,059(18.9%)  | 0.03 |
| HDL level (mg/dl); mean (sd)                             | 44.06 (13.06)   | 45.87 (35.23)   | 0.07  | 44.15 (13.15)  | 44.23 (12.95)  | 0.01  | 43.83 (13.15)   | 45.40 (33.54)   | 0.06  | 43.95 (13.09)  | 44.23 (27.86)  | 0.01 |
| Patients with HDL results available; n (%)               | 2,505 (17.5%)   | 25,737(20.2%)   | 0.07  | 2,340 (17.7%)  | 2,486 (18.8%)  | 0.03  | 20,253(17.3%)   | 42,109(18.8%)   | 0.04  | 12,889(17.3%)  | 13,675(18.4%)  | 0.03 |
| Triglyceride level (mg/dl); mean (sd)                    | 208.61 (219.43) | 195.14(179.16)  | -0.07 | 209.34(223.32) | 207.74(220.51) | -0.01 | 207.98(200.38)  | 192.77(173.54)  | -0.08 | 205.21(193.85) | 204.64(193.80) | 0.00 |
| Patients with triglyceride results available; n (%)      | 2,521 (17.6%)   | 25,742(20.2%)   | 0.07  | 2,356 (17.8%)  | 2,465 (18.7%)  | 0.02  | 20,387(17.4%)   | 42,117(18.8%)   | 0.04  | 12,980(17.4%)  | 13,705(18.4%)  | 0.03 |
| <b>SGLT2i/DPP4i agent initiated on the index date</b>    |                 |                 |       |                |                |       |                 |                 |       |                |                |      |
| Canagliflozin; n (%)                                     | -               | -               | -     | -              | -              | -     | 112,639 (68.7%) | -               | -     | 77,061 (68.6%) | -              | -    |
| Dapagliflozin; n (%)                                     | -               | -               | -     | -              | -              | -     | 33,315(20.3%)   | -               | -     | 20,875(18.6%)  | -              | -    |
| Empagliflozin; n (%)                                     | 18,810(100.0%)  | -               | -     | 17,551(100.0%) | -              | -     | 18,115(11.0%)   | -               | -     | 14,342(12.8%)  | -              | -    |
| Alogliptin; n (%)                                        | -               | 4,686 (1.6%)    | -     | -              | 549 (3.1%)     | -     | -               | 7,738 (1.6%)    | -     | -              | 3,212 (2.9%)   | -    |
| Linagliptin; n (%)                                       | -               | 54,951 (19.1%)  | -     | -              | 3,354 (19.1%)  | -     | -               | 86,334 (17.8%)  | -     | -              | 18,214 (16.2%) | -    |
| Sitagliptin; n (%)                                       | -               | 201,705 (70.0%) | -     | -              | 11,663 (66.5%) | -     | -               | 334,920 (69.0%) | -     | -              | 77,664 (69.2%) | -    |
| Saxagliptin; n (%)                                       | -               | 26,925 (9.3%)   | -     | -              | 1,990 (11.3%)  | -     | -               | 56,337 (11.6%)  | -     | -              | 13,210 (11.8%) | -    |

DPP-4: dipeptidyl peptidase-4; St. Diff: standardized differences; sd: standard deviation; Q: quarter; GLP-1 RA: glucagon-like peptide-1 receptor agonists

\* Only available in Medicare fee-for-service

† Defined as patients without any use of glucose-lowering medications during the 12 months prior to cohort entry

‡ Only available in OptumClinformatics and Truven MarketScan

**Supplemental Table 3. Database-specific incidence rates and hazard ratios for hospitalization for heart failure in 1:1 PS-matched initiators of empagliflozin vs. sitagliptin, empagliflozin vs. DPP-4i, and SGLT2i vs. DPP-4i**

| Patient population |          | Empagliflozin                   |                             | Sitagliptin                     |                             | HR<br>(95% CI)      | Empagliflozin                   |                             | DPP-4i                          |                             | HR<br>(95% CI)      | SGLT2i                            |                             | DPP-4i                            |                             | HR<br>(95% CI)       |
|--------------------|----------|---------------------------------|-----------------------------|---------------------------------|-----------------------------|---------------------|---------------------------------|-----------------------------|---------------------------------|-----------------------------|---------------------|-----------------------------------|-----------------------------|-----------------------------------|-----------------------------|----------------------|
|                    |          | N patients<br>(Person-years)    | N events<br>(IR/1000<br>PY) | N patients<br>(Person-years)    | N events<br>(IR/1000<br>PY) |                     | N patients<br>(Person-years)    | N events<br>(IR/1000<br>PY) | N patients<br>(Person-years)    | N events<br>(IR/1000<br>PY) |                     | N patients<br>(Person-years)      | N events<br>(IR/1000<br>PY) | N patients<br>(Person-years)      | N events<br>(IR/1000<br>PY) |                      |
| HHF-Specific*      | Optum    | 3,193<br>(1,407)                | 0 (0.0)                     | 3,193<br>(1,283)                | 14 (10.9)                   | -                   | 3,934<br>(1720)                 | 0 (-)                       | 3,934<br>(1580)                 | 9 (5.7)                     | -                   | 21,514<br>(11,995)                | 14 (1.2)                    | 21,514<br>(10,137)                | 40 (4.0)                    | 0.37<br>(0.22, 0.62) |
|                    | Truven   | 8,966<br>(4,332)                | 5 (1.2)                     | 8,966<br>(3,987)                | 8 (2.0)                     | 0.60<br>(0.20-1.85) | 9,267<br>(4494)                 | 5 (1.1)                     | 9,267<br>(4086)                 | 11 (2.7)                    | 0.42<br>(0.15-1.21) | 52,896<br>(32,456)                | 33 (1.0)                    | 52,896<br>(28,339)                | 89 (3.1)                    | 0.33<br>(0.22, 0.49) |
|                    | Medicare | 4,284<br>(1,726)                | 11 (6.4)                    | 4,284<br>(1,872)                | 26 (13.9)                   | 0.47<br>(0.23-0.94) | 4,350<br>(1755)                 | 11 (6.3)                    | 4,350<br>(1817)                 | 22 (12.1)                   | 0.53<br>(0.25-1.08) | 37,854<br>(20,890)                | 128 (6.1)                   | 37,854<br>(21,472)                | 285 (13.3)                  | 0.46<br>(0.37, 0.57) |
|                    | Pooled   | <b>16,443</b><br><b>(7,465)</b> | 16 (2.1)                    | <b>16,443</b><br><b>(7,142)</b> | 48 (6.7)                    | 0.50<br>(0.28-0.91) | <b>17,551</b><br><b>(7,969)</b> | 16 (2.0)                    | <b>17,551</b><br><b>(7,483)</b> | 42 (5.6)                    | 0.49<br>(0.27-0.89) | <b>112,264</b><br><b>(65,341)</b> | 175 (2.7)                   | <b>112,264</b><br><b>(59,948)</b> | 414 (6.9)                   | 0.42<br>(0.35-0.50)  |
| HHF-Broad†         | Optum    | 3,193<br>(1,405)                | 7 (5.0)                     | 3,193<br>(1,280)                | 29 (22.7)                   | 0.22<br>(0.10-0.51) | 3,934<br>(1717)                 | 9 (5.2)                     | 3,934<br>(1578)                 | 20 (12.7)                   | 0.43<br>(0.19-0.94) | 21,514<br>(11,964)                | 91 (7.6)                    | 21,514<br>(10,117)                | 127 (12.6)                  | 0.63<br>(0.48, 0.82) |
|                    | Truven   | 8,966<br>(4,324)                | 25 (5.8)                    | 8,966<br>(3,981)                | 32 (8.0)                    | 0.73<br>(0.43-1.23) | 9,267<br>(4486)                 | 26 (5.8)                    | 9,267<br>(4080)                 | 39 (9.6)                    | 0.61<br>(0.37-1.00) | 52,896<br>(32,386)                | 219 (6.8)                   | 52,896<br>(28,249)                | 328 (11.6)                  | 0.59<br>(0.49, 0.70) |
|                    | Medicare | 4,284<br>(1,718)                | 46 (26.8)                   | 4,284<br>(1,859)                | 97 (52.2)                   | 0.51<br>(0.36-0.72) | 4,350<br>(1747)                 | 47 (26.9)                   | 4,350<br>(1801)                 | 87 (48.3)                   | 0.56<br>(0.39-0.79) | 37,854<br>(20,714)                | 745 (36.0)                  | 37,854<br>(21,209)                | 1,031 (48.6)                | 0.74<br>(0.67, 0.81) |
|                    | Pooled   | <b>16,443</b><br><b>(7,447)</b> | 78 (10.5)                   | <b>16,443</b><br><b>(7,120)</b> | 158 (22.2)                  | 0.51<br>(0.39-0.68) | <b>17,551</b><br><b>(7,950)</b> | 82 (10.3)                   | <b>17,551</b><br><b>(7,459)</b> | 146 (19.6)                  | 0.56<br>(0.43-0.73) | <b>112,264</b><br><b>(65,064)</b> | 1,055 (16.2)                | <b>112,264</b><br><b>(59,575)</b> | 1,486 (24.9)                | 0.70<br>(0.65-0.75)  |

HHF: hospitalization for heart failure; PS: propensity-score; DPP-4i: dipeptidyl peptidase-4 inhibitors; SGLT2i: sodium-glucose co-transporter-2 inhibitors; IR: incidence rate; PY: person-years; HR: hazard ratio; CI: confidence intervals.

\* Discharge diagnosis of HF in the primary position

† Discharge diagnosis of HF in any position

**Supplemental Table 4. 1:1 high-dimensional-PS-matched initiators of empagliflozin vs. sitagliptin.**

|                                                 | <b>Empagliflozin</b>             | <b>Sitagliptin</b>               |                        |
|-------------------------------------------------|----------------------------------|----------------------------------|------------------------|
| <b>Sensitivity Analyses</b>                     | <b>N events<br/>(IR/1000 PY)</b> | <b>N events<br/>(IR/1000 PY)</b> | <b>HR<br/>(95% CI)</b> |
| <b>1:1 high-dimensional-PS-matched patients</b> | <b>16,539</b>                    | <b>16,539</b>                    |                        |
| HHF-Specific*                                   | 16 (2.1)                         | 40 (5.6)                         | 0.54 (0.29-0.98)       |
| HHF-Broad†                                      | 81 (10.8)                        | 148 (20.9)                       | 0.54 (0.41-0.71)       |

HHF: hospitalization for heart failure; PS: propensity-score; IR: incidence rate; PY: person-years; HR: hazard ratio; CI: confidence intervals.

\* Discharge diagnosis of HF in the primary position

† Discharge diagnosis of HF in any position

**Supplemental Table 5. Incidence rates and hazard ratios for hospitalization for heart failure (broad definition) in 1:1 PS-matched initiators of empagliflozin vs. sitagliptin stratified by duration of follow-up.**

|                                                              | Empagliflozin            | Sitagliptin              |                  |
|--------------------------------------------------------------|--------------------------|--------------------------|------------------|
| Stratified analysis                                          | N events<br>(IR/1000 PY) | N events<br>(IR/1000 PY) | HR (95% CI)      |
| <b>Lower than median follow-up*</b>                          |                          |                          |                  |
| Number of patients                                           | 16,443                   | 16,443                   |                  |
| HHF-Broad <sup>†</sup>                                       | 28 (4.7)                 | 58 (10.5)                | 0.51 (0.32-0.81) |
| <b>Greater than or equal to median follow-up<sup>‡</sup></b> |                          |                          |                  |
| Number of patients                                           | 8,720                    | 8,720                    |                  |
| HHF-Broad <sup>†</sup>                                       | 50 (34.2)                | 100 (63.0)               | 0.54 (0.38-0.76) |

HHF: hospitalization for heart failure; PS: propensity-score; IR: incidence rate; PY: person-years; HR: hazard ratio; CI: confidence intervals.

\* Patients were censored on the day prior to the median follow-up (=112 days)

<sup>†</sup> Discharge diagnosis of HF in any position

<sup>‡</sup> Patients' follow-up started on the day of median follow-up and continued in an "as-treated" approach until the first occurrence of treatment discontinuation or switch to a drug in the comparator class, the occurrence of an outcome, a nursing home admission, death, plan disenrollment, or September 30, 2016. This analysis was restricted to the patients who had not been censored prior to the median follow-up

**Supplemental Table 6. Incidence rates and hazard ratio for the occurrence of flu vaccination during follow-up in 1:1 PS-matched initiators of empagliflozin vs. sitagliptin.**

|                                                                     | <b>Empagliflozin</b><br>(n=16,443)     | <b>Sitagliptin</b><br>(16,443)         |                    |
|---------------------------------------------------------------------|----------------------------------------|----------------------------------------|--------------------|
|                                                                     | <b>N events</b><br><b>(IR/1000 PY)</b> | <b>N events</b><br><b>(IR/1000 PY)</b> | <b>HR (95% CI)</b> |
| <b>Control outcome with expected null finding - flu vaccination</b> | 1,927 (286.1)                          | 1,939 (303.1)                          | 0.96 (0.90-1.02)   |

PS: propensity-score; IR: incidence rate; PY: person-years; HR: hazard ratio; CI: confidence intervals.
